1       **An integrative systems medicine approach to delineate complex genotype-**  
2                                   **phenotype associations in Autism Spectrum Disorder**

3       Muhammad Asif<sup>1,2,3</sup>, Hugo F.M.C. Martiniano<sup>1,2</sup>, Ana Rita Marques<sup>1,2</sup>, João Xavier Santos<sup>1,2</sup>,  
4       Joana Vilela<sup>1,2</sup>, Celia Rasga<sup>1,2</sup>, Guiomar Oliveira<sup>4,5,6</sup>, Francisco M. Couto<sup>3</sup>, Astrid M. Vicente<sup>1,2\*</sup>

5       \* [astrid.vicente@insa.min-saude.pt](mailto:astrid.vicente@insa.min-saude.pt)

6       <sup>1</sup>Instituto Nacional de Saúde Doutor Ricardo Jorge, Avenida Padre Cruz, 1649-016 Lisboa,  
7       Portugal

8       <sup>2</sup>BioISI: Biosystems & Integrative Sciences Institute, Faculdade de Ciências, Universidade de  
9       Lisboa, Lisboa, Portugal

10

11       <sup>3</sup>LaSIGE, Faculdade de Ciências, Universidade de Lisboa, Lisboa, Portugal

12       <sup>4</sup>Unidade de Neurodesenvolvimento e Autismo (UNDA), Serviço do Centro de Desenvolvimento  
13       da Criança, Centro de Investigação e Formação Clínica, Hospital Pediátrico, Centro Hospitalar e  
14       Universitário de Coimbra, Coimbra, Portugal

15       <sup>5</sup>Institute for Biomedical Imaging and Life Sciences, Faculty of Medicine, Universidade de  
16       Coimbra, Coimbra, Portugal

17       <sup>6</sup>University Clinic of Pediatrics, Faculty of Medicine, University of Coimbra, Portugal

18

19

20

21

22

23

24

## Abstract

25 **Background:** The heterogeneous phenotype and complex genetic architecture of Autism  
26 Spectrum Disorder (ASD) has thus far limited our understanding of genotype-phenotype  
27 correlations, hindering early diagnosis and patient prognosis. Copy Number Variants (CNVs)  
28 targeting a diversity of genes have been implicated in ASD, however correlations with clinical  
29 patterns are unclear.

30 **Methods:** In this study, we developed a novel machine learning integrative approach that seeks  
31 to delineate associations between ASD clinical profiles and disrupted biological processes  
32 inferred from CNVs spanning brain-expressed genes.

33 **Results:** Clustering analysis of relevant clinical measures from 2446 ASD cases, retrieved from  
34 the Autism Genome Project (AGP) database, identified two distinct phenotypic subgroups, with  
35 a milder and a more severe phenotype. Patients in the two clusters differed significantly in verbal  
36 status, ADOS-defined severity, adaptive behaviour profiles and intellectual ability, with verbal  
37 status contributing the most for cluster stability and cohesion. In the clustered ASD cases,  
38 functional enrichment analysis of brain-expressed genes disrupted by rare CNVs identified 15  
39 statistically significant biological processes. These biological processes included cell adhesion,  
40 nervous system development, cognition and protein polyubiquitination and were in line with  
41 previous ASD findings. Random Forest feature importance analysis showed a positive  
42 contribution of all disrupted biological processes to the classification of ASD cases in the  
43 identified clusters. A Naive Bayes classifier was generated to predict the ASD phenotype from  
44 the identified disrupted biological processes. For a subset of patients with higher Information  
45 Content scores calculated for the disrupted biological processes, the classifier achieved  
46 predictions with a high precision but low recall (Precision: 0.82, Recall: 0.39).

47 **Conclusions:** This study highlights the usefulness of machine learning approaches to reduce  
48 clinical heterogeneity by taking advantage of multidimensional clinical measures. Furthermore, it  
49 shows that phenotype-genotype correlations can be established in ASD, and that milder and more  
50 severe clinical presentations have distinct underlying biological mechanisms. However, precise  
51 predictions of the phenotype from genetic data were only achieved for the subset of patients with  
52 higher biological information content. These findings are therefore a first step towards the

53 translation of genetic information into clinically useful applications, while emphasizing the need  
54 for larger datasets with complete clinical and biological information.

## 55 **Keywords**

56 Autism Spectrum Disorder (ASD), machine learning, integrative systems medicine,  
57 genotype/phenotype associations, ASD heterogeneity, integrating data, CNVs

## 58 **Background**

59 Autism Spectrum Disorder (ASD) is a neurodevelopmental disorder that manifests with  
60 persistent deficits in social communication and interaction, and unusual or repetitive behaviour  
61 and/or restricted interests [1]. ASD presents a highly heterogeneous clinical phenotype and  
62 frequently co-occurs with other comorbidities, such as Intellectual Disability (ID), epilepsy and  
63 Attention Deficit Hyperactivity Disorder (ADHD) [2–6]. Heritability estimates indicate a strong  
64 genetic influence in ASD aetiology [7–9], however reliable genetic markers for the disease are  
65 unavailable. ASD is diagnosed through neurodevelopmental assessment, which can be  
66 challenging especially in the case of very young children. Improving early diagnosis and  
67 prognosis using biological markers with a robust predictive power would provide an advantage  
68 to young patients, who benefit the most from an early start of specific intervention [10].

69 Copy Number Variant (CNV) screening is nowadays widely used for etiological diagnosis, with  
70 causative genetic alterations identified in approximately 25% of ASD cases [11]. A large number  
71 of rare genetic variants have been implicated in ASD, and the wide genetic heterogeneity that  
72 characterizes this disorder likely contributes to phenotypic variability in ASD patients [12].  
73 Integrative pathway and network analysis of large scale ASD genomic studies have advanced  
74 significantly the identification of disrupted biological processes [13–17]; however, our  
75 understanding of the biological meaning of the large number of putative pathogenic variants,  
76 their phenotypic manifestations, and the reliable interpretation of many genetic findings for  
77 clinical application is still lagging.

78 To improve our ability to infer clinical meaning from rare CNVs in ASD, for eventual  
79 application as biological markers, we developed a machine learning-based approach involving  
80 the integration of gene functional annotations and clinical phenotypes. Our approach was

81 developed in four steps, namely: 1) definition of clinically distinct subgroups in ASD cases; 2)  
82 discovery of functionally enriched biological processes defined by rare CNVs disrupting brain-  
83 expressed genes in the same ASD cases; 3) assessment of the contribution of disrupted biological  
84 processes for classification of ASD phenotypes; 4) design and predictive effectiveness  
85 characterization of a machine learning classifier for clinical outcome in ASD patients.

86

87

## Methods

88 Figure 1 shows the graphical representation of the overall methodology, described in detail  
89 below.

90

91 Figure 1: Integrative systems medicine approach to identify complex genotype-phenotype  
92 associations. Clinical and genetic data from the Autism Genome Project (AGP) was used in this  
93 study **(A)** Clinical data analysis processing: clinical data comprises reports of ASD diagnosis and  
94 neurodevelopmental assessment instruments. Agglomerative Hierarchical Clustering (AHC) was  
95 used to identify clinically similar subgroups of individuals in stable, validated clusters, defined  
96 by multiple clinical measures. **(B)** CNV data processing: rare high confidence CNVs previously  
97 identified by the AGP, targeting brain-expressed genes, were retained for analysis. CNV data  
98 was merged with clinical data from clustered ASD subjects for a final list of CNVs targeting  
99 brain genes. **(C)** Functional annotation analysis: Biological processes defined by brain-expressed  
100 genes targeted by CNVs were obtained using g:Profiler. **(D)** Classifier design: A Naive Bayes  
101 machine learning classifier was trained and tested on patient's data, to predict the phenotypic clustering of  
102 patients from biological processed disrupted by rare CNVs targeting brain-expressed genes.

### 103 • **Participants**

104 The ASD dataset used in this study was obtained from the Autism Genome Project (AGP) [18]  
105 database, and comprises CNV data and clinical information from 2446 ASD patients. The AGP  
106 was an international collaborative effort from over 50 different institutions to identify risk genes  
107 for ASD. The group of individuals with phenotypic information from clustering and rare CNV  
108 data, used in final analysis included 1213 males (83.4%) and 144 females (10.6%).

109 • **ASD diagnosis, clinical assessment instruments and clinical features**

110 Individuals meeting criteria defined by the Diagnostic and Statistical Manual of Mental  
111 Disorders IV (DSM-IV) [19] and the thresholds for Autism or ASD from the Autism Diagnostic  
112 Interview-Revised (ADI-R) [20] and the Autism Diagnostic Observation Schedule (ADOS) were  
113 classified as ASD cases [21]. The AGP defined a phenotypic classification system based on the  
114 combined ADI-R and ADOS diagnosis, categorizing subjects into Strict (meeting thresholds for  
115 Autism by the ADI-R and ADOS), Broad (meeting thresholds for Autism from one instrument  
116 and ASD from the other) and Spectrum (meeting thresholds for Autism from at least one  
117 instrument or ASD from both). Individuals with an ASD diagnosis from only one instrument and  
118 no information from the other, or not meeting thresholds for Autism or ASD from one of the  
119 instruments, regardless from the classification from the other, were not included in the study.  
120 Clinical measures used in this study were retrieved from the AGP database, including the ADIR  
121 verbal status, ADOS severity score, Vineland Adaptive Behaviour Scales (VABS) [22] subscales  
122 and an Intelligence Quotient (IQ).

123 The ADI-R verbal status is a dichotomized measure indicating the verbal status of the individual  
124 at evaluation. The ADOS severity metric ranges from 1 to 10 and is calculated from ADOS  
125 modules 1 to 3 raw scores [23]. As there is no algorithm available to calculate ADOS severity  
126 score for ADOS module 4 reports, which is applied only to adolescents and adults, subjects with  
127 the ADOS module 4 (N= 149) were dropped from further processing. The severity score  
128 distribution is collapsed into three categories, namely Autism (severity scores ranging from 6 to  
129 10), ASD (severity scores ranging from 4 to 5) and Non-Spectrum (severity scores from 1 to 3),  
130 which reflect the mapping of the severity metric onto raw ADOS scores. The ADOS Non-  
131 spectrum category includes individuals with a mild phenotype, and in this study 125 individuals  
132 with a Non-spectrum ADOS severity score fell within the Spectrum phenotypic class from the  
133 AGP, meaning they met thresholds for autism from the ADI-R, and were thus included.

134 The VABS is used to assess adaptive functioning of individuals and consists of three subscales,  
135 namely, socialization, communication and daily living skills scores, and also computes a  
136 composite score. Subjects with VABS scores  $\leq 70$  were classified in a dysfunctional adaptive  
137 behavior category, for all subscales. IQ scores of ASD cases were also retrieved from the AGP

138 database, and categorized with the following thresholds:  $IQ > 70$  normal,  $50 < IQ < 70$  mild  
139 intellectual disability,  $IQ < 50$  severe intellectual disability.

140 Clinical reports from the ASD patients were examined for missing values, and clinical features  
141 with more than 70% information were retained for the analysis. To minimise missing value  
142 imputation bias, individuals with missing values above this threshold for more than two clinical  
143 features were also excluded. Completeness of each clinical feature is reported in Table S1  
144 (Additional file 1). Missing values were imputed using the missForest [24] R package that  
145 implements the Random Forest [25] algorithm, a decision tree-based supervised machine  
146 learning method. Imputation error was assessed using the normalised global Proportion of  
147 Falsely Classification (PFC), and the missing values imputation error was 0.12.

#### 148 • **Clustering analysis of ASD clinical data**

149 To focus on core domains of ASD symptoms, verbal skills, disease severity, adaptive behavior  
150 and intellectual levels, which strongly condition prognosis, were selected for further analysis.  
151 Verbal status was obtained from the ADI-R, ASD severity scored from the ADOS, adaptive  
152 functioning from the VABS, using its three subdomains, and a performance IQ category from the  
153 IQ assessment contributed by participating sites to the AGP database. Other IQ domains had too  
154 many missing values to be used. The Agglomerative Hierarchical Clustering (AHC) [26] method  
155 was used to identify independent phenotypic subgroups from the selected clinical features.  
156 Correlations between clinical features were assessed using the Pearson method, and features with  
157 a correlation value of  $> 0.75$  were considered correlated. The Gower [27] metric was used to  
158 calculate the distance matrix from the patient's clinical data. To normalise the effect of highly  
159 correlated variables on clustering, the weight for correlated variables (VABS subscales of  
160 socialisation, communication, and daily living skills) was reduced to half during distance matrix  
161 calculation. To identify phenotypic subgroups, the AHC method using Ward2 [28] criteria was  
162 applied to the distance matrix.

163 To assess the contributions of each clinical feature in defining the clusters, we excluded one  
164 feature at a time, re-performed the clustering and observed the changes in Silhouette values of  
165 both clusters. For this purpose, we selected Silhouette value as an evaluation metric because it

166 was also used to define outliers in clinical data. A decrease in the Silhouette value of a cluster  
167 after removing one feature indicates its importance in defining this cluster and vice versa.

168 • **Goodness of clustering assessment**

169 A Silhouette method [29] was employed to estimate the goodness of the clustering results. The  
170 Silhouette value for each individual shows how well the individual is clustered, and ranges from  
171 -1 to 1, with individuals scoring below 0 considered as wrongly clustered. In addition, the  
172 Silhouette value for each cluster was derived, and clusters with Silhouette value of  $> 0.25$  were  
173 considered as true clusters. Bootstrapping with 1000 iterations was used to measure the stability  
174 of clusters, where a boot mean value above 0.85 corresponds to stable clusters. All clustering  
175 analysis was performed in R environment, using Cluster [30] and FPC packages.

176 • **Functional enrichment analysis**

177 Genotyping and CNV calling methods for the AGP ASD subjects (N=2446) were previously  
178 described [18]. CNVs called by any two algorithms (high confidence CNVs) and above 30kb in  
179 size were retained for further analysis. To screen for rare CNVs ( $<1\%$  in control population)  
180 CNV frequencies in control populations were estimated using the genotypes from the studies by  
181 Sheikh et al. [31] (N = 1320) and Cooper et al. [32] (N = 8329), identified using the same  
182 genotyping platform [18]. Control genotypes were obtained from the Database of Genomic  
183 Variants (DGV) [33].

184 To focus CNV selection on variants spanning brain-expressed genes, avoiding *a priori*  
185 hypotheses from ASD candidate gene assumptions, an extensive list comprising 15585 brain-  
186 expressed genes was obtained from Parikshak et al. [34]. The brain-expressed gene list was  
187 prepared from brain RNA-seq data, collected at thirteen different developmental stages,  
188 including genes expressing during early brain developmental phase. The full criteria and  
189 parameters used to define the brain-expressed gene list were previously described [34]. .

190 The g:Profiler [35] tool was employed to identify biological processes enriched for brain-  
191 expressed genes spanned by rare CNVs in ASD individuals. g:Profiler implements a  
192 hypergeometric test to estimate the statistical significance of enriched biological processes,  
193 followed by multiple corrections for the tested hypotheses using the Benjamini-Hochberg

194 procedure. g:Profiler uses Gene Ontology (GO) data to find the biological annotations for input  
195 genes.

196 The GO tool contains a Directed Acyclic Graph (DAG) structure with a clear hierarchical parent-  
197 to-child relationship between GO terms. Because of this DAG structure, functional enrichment  
198 analysis can result in redundant GO terms, which may lead to high correlations between GO  
199 terms. To minimise the correlations between GO terms, the Revigo [36] tool was employed to  
200 redundant GO results. Revigo uses the methods of semantic similarity to measure similarities  
201 between GO terms. The SimRel [37] method was used to calculate similarities between GO  
202 terms, and terms with a similarity score of  $> 0.7$  were grouped.

### 203 • **Feature importance assessment**

204 The mean decrease in accuracy of the Random Forest algorithm was used to compute the  
205 importance score of each disrupted biological process for categorizing ASD subjects into defined  
206 phenotypic clusters. A stratified ten-fold cross-validation quan

207 tifies the importance of all features. The importance score of all disrupted biological processes  
208 was recorded at each fold. A final importance score for each biological process was calculated by  
209 averaging their importance score values across all the ten folds. Random Forest was  
210 implemented using `randomForest` R package [38].

### 211 • **Classifier learning and cross-validation**

212 A Naive Bayes [39] machine learning method was employed to predict the ASD phenotypic  
213 group, defined by the clustering analysis, from biological processes disrupted by rare CNVs.  
214 This method employs the Bayes theorem of probability for training and testing of the model, and  
215 the algorithm was implemented using the `klaR` R package with default parameters. Precision,  
216 recall, specificity and F-score were used as evaluation measures. To train and test the Naive  
217 Bayes, a stratified five-fold cross-validation approach was used, in which data was first split into  
218 five equal subsets with equal class probabilities; a Naive Bayes model was trained on any four  
219 subsets, and the remaining subset was used as the test set. This process was repeated five times  
220 and each time a different subset was used as test set. For each repetition, the model performance  
221 was estimated and mean values for precision, recall, specificity and F-score were reported. The



222 Naive Bayes classifier was trained on patient’s data by using the “more severe” cluster as the  
223 positive class and the “less severe” cluster as the negative class.

224 The Information Content (IC) from each individual represents the level of specificity of  
225 biological processes disruption, and was derived by summing the IC values of all the biological  
226 processes disrupted in each individual. IC is a numerical value that describes the specificity of a  
227 GO term using its position in the GO DAG structure.

228

229

## Results

### • Identification of ASD clusters defined by clinical phenotype

230  
231 A total of 1817 ASD subjects from the AGP were retained for analysis after assessment of  
232 missing values in clinical features. Agglomerative hierarchical clustering analysis of clinical  
233 observations from these patients initially identified two phenotypically independent clusters. To  
234 minimise the phenotypic complexity and define the most stable and cohesive clusters, weakly  
235 clustered individuals with a Silhouette value less than 0.300 (representing a balance between  
236 number of individuals lost and goodness of clustering) were excluded from the clustering  
237 analysis. After removal of weakly or wrongly clustered individuals, cluster 1 contained 903 ASD  
238 cases, while cluster 2 comprised 494 patients (Table 1). Elimination of the loosely clustered  
239 individuals resulted in more stable and cohesive clusters, with high values for clusters stability  
240 and reduced average distance between the two individuals in a cluster (Table 1).

241

Table 1: Clustering validation, after removal of weakly clustered individuals.

| Clusters validation measures          | Cluster 1 | Cluster 2 |
|---------------------------------------|-----------|-----------|
| Clusters size (N)                     | 903       | 494       |
| Average distance between two patients | 0.235     | 0.231     |
| Silhouette value                      | 0.567     | 0.579     |
| Average Silhouette of both clusters   | 0.571     |           |
| Cluster stability                     | 0.998     | 0.996     |

242

243 Overall, the cluster validation through the Silhouette method and bootstrapping showed that both  
244 clusters were true and consistent.

245 • **Clinical interpretations of the clusters**

246 All clinical measures differed significantly between the two clusters, as shown in Table 2.  
247 Cluster 1 (Additional file 1: black circles in Figure S1) includes a higher number of individuals,  
248 who generally exhibited a milder clinical phenotype, while Cluster 2 (Additional file 1: red  
249 triangles in Figure S1) included a higher percentage of subjects with severe dysfunction. All  
250 individuals in Cluster 1 were verbal according to the ADI-R, while Cluster 2 included only non-  
251 verbal cases. The mean age of ADI-R assessment was 7.7 years, an age when verbal status is  
252 generally well established. Furthermore, the mean age of individuals in Cluster 1 (mean age  
253 8.02) and Cluster 2 (mean age 7.01) did not significantly differ.

254 For all VABS sub-domains, roughly half of the subjects in Cluster 1 were in the normal range;  
255 conversely, over 97% of individuals belonging to Cluster 2 showed dysfunctional adaptive  
256 behaviour. Consistent with the other clinical measures, over 96% of cases from Cluster 1, but  
257 less than one third in Cluster 2, scored at the normal level in performance IQ, while a much  
258 higher percentage of ASD cases from Cluster 2 than from Cluster 1 presented with a  
259 performance IQ in the range of severe intellectual disability.

260 Regarding the ADOS severity score, approximately 14% of the individuals in Cluster 1 were  
261 assigned to the milder category of the ADOS severity score (“Non-spectrum” for ADOS, but  
262 scoring positive for “Autism” in the ADI-R, and therefore classified in the AGP “Spectrum”  
263 phenotypic class, see methods). Conversely, none of the individuals in Cluster 2 scored in this  
264 category. On the other hand, a significantly higher percentage of cases in Cluster 2 (20.65%)  
265 than individuals in Cluster 1 (7.09%) scored in the intermediate ASD severity category. It is  
266 noteworthy that both clusters show a similarly high percentage of individuals scoring in the  
267 “Autism” ADOS severity category. This is not surprising since this broad category (scores  
268 ranging from 6 to 10) comprises all subjects classified in the Strict AGP phenotype class but also  
269 a large proportion of individuals in the AGP Broad phenotype class. The “Autism” ADOS  
270 severity score therefore targets a subset of the study population that can be quite heterogeneous  
271 in phenotypic presentation. Corroborating this, we found that the “Autism” category of the

272 ADOS severity score is not significantly associated with the clusters ( $\chi^2 = 0.15$ ,  $p = 0.901$ ,  $df =$   
 273 2), even though overall there is a significant association of the overall ADOS severity scores  
 274 (Table 2).

275 Table 2: Clusters 1 and 2 statistics for each clinical measure.

| Clinical measure         | Clinically defined categories                             | Cluster 1 N (%) | Cluster 2 N (%) | <i>p</i> -value       |
|--------------------------|-----------------------------------------------------------|-----------------|-----------------|-----------------------|
| ADIR verbal status       | ADI-R-non verbal                                          | 0 (0)           | 494 (100)       | <0.00001 <sup>a</sup> |
|                          | ADI-R-verbal                                              | 903 (100)       | 0 (0)           |                       |
| ADOS severity score      | ADOS severity score Autism (score 6-10)                   | 714 (79.07)     | 392 (79.35)     | <0.00001 <sup>b</sup> |
|                          | ADOS severity score ASD (score 4-5)                       | 64 (7.09)       | 102 (20.65)     |                       |
|                          | ADOS severity score Non-spectrum (score 1-3)              | 125 (13.84)     | 0 (0)           |                       |
| VABS communication       | Dysfunctional VABS communication (score $\leq 70$ )       | 307 (34)        | 493 (99.8)      | <0.00001 <sup>a</sup> |
|                          | Normal VABS communication (score $> 70$ )                 | 596 (66)        | 1 (0.2)         |                       |
| VABS daily living skills | Dysfunctional VABS daily living skills (score $\leq 70$ ) | 478 (52.94)     | 484 (97.98)     | <0.00001 <sup>b</sup> |
|                          | Normal VABS daily living skills (score $> 70$ )           | 425 (47.07)     | 10 (2.02)       |                       |
| VABS socialization       | Dysfunctional VABS socialization (score $\leq 70$ )       | 497 (55.04)     | 490 (99.19)     | <0.00001 <sup>a</sup> |
|                          | Normal VABS socialization (score $> 70$ )                 | 406 (44.96)     | 4 (0.81)        |                       |
| Performance IQ Scale     | Severe disability (score $<50$ )                          | 2 (0.22)        | 218 (44.13)     | <0.00001 <sup>b</sup> |
|                          | Moderate disability (score $\geq 50$ and $\leq 70$ )      | 31 (3.43)       | 125 (25.3)      |                       |
|                          | Normal ability (score $> 70$ )                            | 870 (96.35)     | 151 (30.57)     |                       |
| Gender                   | Male                                                      | 830 (91.92)     | 417 (84.41)     | 0.000015 <sup>b</sup> |
|                          | Female                                                    | 73 (8.08)       | 77 (15.59)      |                       |

276 <sup>a</sup>Fisher Exact Test, <sup>b</sup>Chi-Square test

277 Both clusters were strongly dominated by the male gender, partly because of the high percentage  
 278 of males in the dataset after the elimination of weakly or wrongly clustered individuals.  
 279 However, the percentage of males was higher in cluster 1, representing the milder phenotype,  
 280 consistent with general observations that male to female ratios are higher in datasets that  
 281 comprise more high- function ASD individuals.

282 Analysis of the contribution of each clinical feature in defining clusters showed that the main  
283 contributor was the ADIR verbal status variable (Additional file 1: Table S2). The VABS  
284 subscales had a strong effect on Cluster 1 but a modest role in defining Cluster 2. Performance  
285 IQ also contributed more to Cluster 1 whereas for Cluster 2 it has the least effect. The ADOS  
286 severity score did not have a major role in defining either cluster, as indicated by the similar high  
287 percentage of subjects scoring within the range of “Autism” in the ADOS severity scale in both  
288 clusters. Similarly, gender was not an important contributor to the definition of either cluster.

289 • **Disrupted biological processes from brain-expressed genes targeted by rare CNVs**

290 CNVs (N=129754) identified in 2446 subjects with ASD were filtered to select rare, high  
291 confidence CNVs, over 30 Kb in size and that contained complete or partial brain-expressed  
292 gene sequences. The selected high confidence, rare CNVs (N=12683) disrupted 4025 brain-  
293 expressed genes in 2414 subjects with ASD (86.8% males and 13.2% females).

294 Phenotypic cluster and rare CNV data was complete for 1357 individuals with ASD, and  
295 available for integration. Functional enrichment analysis of rare CNVs targeting brain-expressed  
296 genes (N=2738) in 1357 patients identified 17 statistically significant biological processes  
297 (Additional file 1: Table S3). g:Profiler did not recognize 187 genes from the input list.

298 The redundancy of GO terms in functional enrichment analysis, caused by overlapping  
299 annotations in ancestors and descendent terms in the DAG structure of GO, was reduced by  
300 grouping the terms that had a semantic similarity score higher than 0.7 (Additional file 1: Table  
301 S3). The Revigo tool used to reduce redundancy did not recognise one biological process  
302 (*Plasma membrane bounded cell projection organization*). After redundancy reduction, 16  
303 biological processes remained (Table 3), with the *Calcium-dependent cell-cell adhesion via*  
304 *plasma membrane cell adhesion molecules* biological process merged with *Homophilic cell*  
305 *adhesion via plasma membrane adhesion molecules* (similarity score = 0.76).

306 The most significant biological process identified in this dataset was *Homophilic cell adhesion*  
307 *via plasma membrane adhesion molecules*, which includes 53 brain-expressed genes disrupted  
308 by the selected CNVs. The ten most significant biological processes were related to cell adhesion  
309 and cellular organization, and also included nervous system development and protein

310 poliubiquitination (Table 3). Moreover, two significant biological processes were related to  
311 behavior and cognition.

312 Table 3: Statistically significant enriched biological processes for CNVs spanning brain-  
313 expressed genes (N=2738). FDR: False Discovery Rate

| Biological processes                                            | Enriched genes (N) | FDR <i>p</i> -value |
|-----------------------------------------------------------------|--------------------|---------------------|
| Homophilic cell adhesion via plasma membrane adhesion molecules | 53                 | 6.30E-09            |
| Cell-cell adhesion via plasma-membrane adhesion molecules       | 66                 | 1.70E-07            |
| Cellular component organization or biogenesis                   | 944                | 5.70E-05            |
| Cellular component organization                                 | 915                | 7.00E-05            |
| Cellular component biogenesis                                   | 475                | 0.00066             |
| Cellular component assembly                                     | 434                | 0.00177             |
| Nervous system development                                      | 363                | 0.00215             |
| Organelle organization                                          | 562                | 0.00475             |
| Protein polyubiquitination                                      | 64                 | 0.00592             |
| Cell projection organization                                    | 231                | 0.00836             |
| Cellular localization                                           | 418                | 0.0091              |
| Single-organism behavior                                        | 83                 | 0.0196              |
| Regulation of cellular component organization                   | 364                | 0.0257              |
| Plasma membrane bounded cell projection organization            | 223                | 0.0282              |
| Cognition                                                       | 56                 | 0.0364              |
| Single-organism organelle organization                          | 263                | 0.044               |

314

315 • **Biological process importance for prediction of ASD clinical phenotype**

316 The enriched biological processes and phenotypic cluster information for ASD cases were  
317 combined in a matrix to assess the predictive value of the biological processes for categorization  
318 in one of the two phenotypic clusters, broadly characterized by a milder and a more severe  
319 phenotypic presentation. The 57 individuals containing both rare CNV and cluster information

320 that did not present any enriched biological process were excluded, so further analysis comprised  
321 1300 ASD patients.

322 Table 4 shows the ranking in importance of disrupted biological processes for categorization of  
323 subjects into ASD phenotypic clusters, computed using the Random Forest importance score  
324 function.

325 Table 4: Importance of each biological process from Random Forest in classifying ASD subjects  
326 into defined phenotypic clusters.

| Random Forest rank | Biological process                                              | Mean Decrease in Accuracy |
|--------------------|-----------------------------------------------------------------|---------------------------|
| 1                  | Regulation of cellular component organization                   | 0.052                     |
| 2                  | Cell projection organization                                    | 0.025                     |
| 3                  | Cellular component assembly                                     | 0.025                     |
| 4                  | Single organism behaviour                                       | 0.020                     |
| 5                  | Organelle organization                                          | 0.018                     |
| 6                  | Single organism organelle organization                          | 0.017                     |
| 7                  | Cellular component biogenesis                                   | 0.014                     |
| 8                  | Cognition                                                       | 0.013                     |
| 9                  | Nervous system development                                      | 0.010                     |
| 10                 | Cellular localization                                           | 0.009                     |
| 11                 | Cellular component organization                                 | 0.006                     |
| 12                 | Protein polyubiquitination                                      | 0.005                     |
| 13                 | Homophilic cell adhesion via plasma membrane adhesion molecules | 0.005                     |
| 14                 | Cell adhesion via plasma membrane adhesion molecules            | 0.005                     |
| 15                 | Cellular component organization or biogenesis                   | 0.003                     |

327

328 The importance of each biological process was calculated using the mean decrease in accuracy,  
329 computed by permuting each biological process. The feature importance analysis using Random  
330 Forest, which was trained and tested using stratified 10-fold cross-validation over the integrated  
331 dataset, revealed positive values for all features, indicating that all of the biological processes are  
332 positively contributing for classification. The most important biological process for the  
333 classification was *Regulation of cellular component organization*, with a mean decrease in  
334 accuracy of 0.052. The most significantly enriched biological process in the overall ASD dataset,  
335 *Homophilic cell adhesion via plasma membrane adhesion molecules* was ranked at position 14,

336 indicating it is not a top contributor to phenotypic categorization of ASD subjects into the  
337 phenotypic clusters, in this population.

338 • **Predicting clinical phenotype from the biological processes disrupted by rare CNVs in**  
339 **ASD patients**

340 The Naive Bayes supervised machine learning method was trained and tested using phenotypic  
341 clustering information and the 15 biological processes inferred from rare CNVs targeting brain-  
342 expressed genes in ASD patients. The classifier was trained with the assumption that ASD  
343 subjects with a more dysfunctional clinical phenotype, subgrouped in Cluster 2, would present a  
344 different pattern of disrupted biological processes from the individuals with a milder expression  
345 of ASD phenotype in Cluster 1.

346 The Naive Bayes classifier trained on data from 1300 patients did not perform well in predicting  
347 the more dysfunctional clinical phenotype from disrupted biological processes (Table 5), with  
348 scores indicating a low accuracy of the predictive model.

349 To further dissect the information available, the biological process Information Content (IC) for  
350 each individual was calculated by summing the IC values for all the biological processes  
351 disrupted in that individual. ASD subjects in the first IC quantile (N = 325) had highest IC  
352 scores, while ASD cases belonging to fourth quantile (N = 326) contained lowest IC scores. The  
353 performance of the Naive Bayes classifier improved when only ASD subjects with higher IC  
354 were selected for analysis. Analysis of the group of individuals with highest IC (first quantile)  
355 resulted in a higher predictability of ASD clinical outcome (Table 5). The classifier trained and  
356 tested on individuals from the first two (1<sup>st</sup> and 2<sup>nd</sup>) and first three (1<sup>st</sup>, 2<sup>nd</sup>, and 3<sup>rd</sup>) quantiles also  
357 performed better than the classifier designed using the whole dataset of clusters and biological  
358 processes (Table 5). The Naive Bayes classifier was thus able to make reasonably good  
359 predictions of ASD severity, but only for a subset of ASD individuals with higher IC. This  
360 indicates that improved GO information, as well as larger datasets with more GO information  
361 available, are needed to usefully integrate clinical and biological data.

362

363

364

365 Table 5: Naive Bayes performance in predicting the severe phenotype of ASD

| Data used for classification                | N          | Precision    | Recall       | Specificity  | F-score      |
|---------------------------------------------|------------|--------------|--------------|--------------|--------------|
| All ASD cases                               | 1300       | 0.221        | 0.379        | 0.655        | 0.279        |
| ASD cases from 1st quantile with highest IC | <b>325</b> | <b>0.816</b> | <b>0.389</b> | <b>0.699</b> | <b>0.526</b> |
| ASD cases from 1st and 2nd quantiles of IC  | 649        | 0.23         | 0.384        | 0.65         | 0.284        |
| ASD cases from first three quantiles of IC  | 974        | 0.29         | 0.389        | 0.672        | 0.329        |

366

367

## Discussion

368 The discovery of diagnostic and prognostic biomarkers for ASD has the potential to improve the  
369 reliability of diagnosis at earlier stages of development, as well as the phenotypic categorization  
370 for prognosis, eventually informing personalized intervention that is particularly beneficial for  
371 very young children. However, in spite of the enormous volume of genetic information generated  
372 by genomic approaches in the past decade, the clinical diagnosis of ASD patients is still solely  
373 based on neurodevelopmental assessment. The results of many genomic tests, including CNV  
374 arrays and clinical exomes, still leave about 80% of the cases without any explanation regarding  
375 the biological pathways underlying their disease and their personal clinical presentation.

376 In this study, we developed a novel integrative approach to predict ASD phenotypes from  
377 biological processes defined by genetic alterations. Overall, our approach sought to exploit  
378 multidimensional clinical measures to define subgroups of ASD patients presenting similar  
379 clinical profiles, and then to identify the biological processes disrupted by CNVs that might  
380 predict these more homogeneous clinical patterns. For the sake of eventual clinical utility, we  
381 chose clinical measures with well-established relevance and frequently used in clinical settings,  
382 but established no other restrictions. Further, we did not set any *a priori* hypothesis for gene  
383 selection, besides being expressed in the brain.

384 The clustering of clinical data from ASD cases resulted in two subgroups that were clearly  
385 distinguishable in terms of severity of phenotype, defined by multiple clinically relevant  
386 measures including verbal status, ASD severity, adaptive function and cognitive ability. The  
387 identification of only two clusters for the clinical phenotype, with an important proportion of  
388 individuals in the AGP dataset that could not be adequately clustered was expected, as it reflects  
389 the high clinical heterogeneity of ASD. The identification of these subgroups was in line with



390 previous results by Veatch et al. [40], who also identified two clusters differing in severity using  
391 two independent population samples, including the Autism Genetic Resource Exchange (AGRE)  
392 and also the AGP dataset. While clinical variables were not fully coincidental between the two  
393 studies, we confirmed that the verbal status, ADOS-based severity, VABS-based  
394 communication, socialization and daily living skills, as well as gender, were all significantly  
395 different between clusters. We noted an unequal contribution of each clinical measure to  
396 definition of each cluster, with verbal status the main contributor and the ADOS severity score a  
397 low contributor for both clusters, while Performance IQ was mainly important for Cluster 1.  
398 In our study, the larger Cluster 1 was characterized by a generally milder phenotype, with all  
399 individuals being verbal, a large proportion in the normal IQ range and significantly higher  
400 numbers of subjects scoring better in adaptive behavior subscales. Cluster 1 also showed a higher  
401 male to female ratio, as expected given the general observation that higher functioning ASD  
402 subgroups have a larger proportion of males. The smaller Cluster 2 included only non-verbal  
403 subjects, and had a higher percentage of subjects with a more dysfunctional phenotype in terms  
404 of adaptive behavior, as well as lower IQ scores. Because cognitive ability is such an important  
405 variable for prognosis, we included performance IQ as a clinical variable, in spite of the  
406 limitations related to the heterogeneity of IQ measurement tools used for patient assessment by  
407 AGP contributing sites. For the AGP dataset, an effort was previously made to rationalize the  
408 tests used, and cognitive level was established using a categorical classification provided by  
409 AGP sites in three categories, namely severe intellectual disability, mild intellectual disability  
410 and normal IQ, for verbal, performance and full scale IQ scores. Limitations were also  
411 introduced by the proportions of missing data; given the adopted control of the validity of  
412 imputation procedures, only performance IQ met the criteria for reliable imputation, so only this  
413 measure was used.  
414 Because our main goal was to improve the power for phenotypic subgroup prediction by  
415 genetically defined biological processes, we focused on obtaining compact and stable clusters by  
416 using strict criteria for cluster stability to assess the goodness of clustering, at the expense of  
417 population sample dimension. As expected, the weakly clustered individuals tended to have more  
418 divergent scores across clinical measures (data not shown), and therefore were more difficult to  
419 cluster with high confidence. It is intriguing that a higher proportion of females than males was  
420 removed, suggesting that this divergence of scores is more frequent in girls. This observation

421 generally supports recent debates on the lower adequateness of assessment criteria to the female  
422 autism phenotype [41].

423 To test the hypothesis that phenotypic subgroups have specific underlying pathological  
424 mechanisms, we first sought to identify the biological processes enriched in the gene sets  
425 disrupted by rare CNVs detected in the AGP dataset. The functional enrichment analysis  
426 conducted in this study was independent of any prior assumptions or weighting criteria of genes  
427 relative to ASD risk. To make functional enrichment analysis hypothesis-free and to let the data  
428 speak, we screened for CNVs disrupting any brain-expressed genes. The objective was to obtain  
429 a complete picture of the convergence of rare CNVs, targeting any brain-expressed genes, into  
430 biological processes relevant for brain function.

431 The biological processes identified in the functional enrichment analysis showed an overlap with  
432 putative core biological mechanisms of ASD defined by previous studies. For example, 363  
433 brain genes spanned by rare CNVs were enriched for neurodevelopment biological process and  
434 56 genes were associated with cognition process. Enrichment of nervous system development  
435 and cognition processes in ASD has been previously reported by studies using different  
436 approaches, including transcriptome analysis and co-expression networks [15] and is supported  
437 by the function of genes most consistently implicated in ASD, like *PTEN*, *RELN*, *SYNGAP1*,  
438 *ANK2*, *SCN2A* and *SHANK3* [42]. Noh et al. analysis of *de novo* CNVs spanning ASD genes  
439 also implicated cognitive processes, and showed a convergence in cellular component  
440 organization or biogenesis, cellular component assembly, and organelle organization biological  
441 processes [16]. Other studies implicated cell adhesion processes in ASD as important  
442 components of synapse formation and function (46, 47). Dysregulation of polyubiquitination was  
443 also in line with previous studies reporting an excess of variants in genes involved in  
444 ubiquitination processes, which regulate neurogenesis, neuronal migration and synapse  
445 formation, and are thus essential for brain development [43–46].

446 This biological heterogeneity parallels the extensive phenotypic heterogeneity that characterizes  
447 ASD. For this reason, we sought to identify the biological processes underlying the more  
448 homogeneous phenotypic subgroups defined by the clusters. The Random Forest algorithm was  
449 used to assess the importance of each enriched biological process in discriminating the two ASD  
450 phenotype subgroups. Feature importance analysis showed that all the biological process  
451 contributed positively to the classification of ASD severity. However, the feature importance

452 ranking was different from the significance ranking of enriched biological processes. Despite  
453 their relevance for ASD, the top three statistically significant biological processes identified by  
454 functional enrichment analysis were least important for the classification of subjects into the  
455 phenotypic milder and more dysfunctional subgroups. These findings support the concept that  
456 the integration of datasets with multidisciplinary information, including genomic and clinical  
457 data, is necessary to discover the biological mechanisms that lead to specific clusters of  
458 symptoms.

459 The Naive Bayes classifier was able to make useful predictions of ASD phenotypic subgroups  
460 from disrupted biological processes, but only for a subset of individuals for whom annotations  
461 had higher information content for the biological processes defined by the CNVs. Currently, GO  
462 contains more than 40,000 biological concepts, which are rapidly evolving with the increasing  
463 knowledge of biological phenomena and with our ability to structure this knowledge. Therefore,  
464 it is expected that the performance of the proposed classifier will improve with the progress in  
465 GO annotations.

466 Given the high clinical heterogeneity of ASD, clustering of individuals according to a  
467 multidimensional phenotype will result in subgroups with more homogeneous clinical patterns  
468 and for whom the causes of this disease are more likely to have the same underlying biological  
469 mechanism. The clustering of individuals according to multidimensional clinical symptoms *per*  
470 *se* is likely to have implication for prognosis and outcomes, as concurrent symptoms may have a  
471 synergistic effect on disease progression, and may thus also help guide clinical practice and  
472 intervention. However, thus far this perspective has been insufficiently explored, and not enough  
473 datasets are yet available with detailed clinical information that can be merged for large scale  
474 analysis. The alterations in diagnostic criteria over time and the changes in versions of  
475 instruments like the ADI-R and the ADOS create important challenges for data merging across  
476 population samples, which are needed so that sufficient statistical power is achieved for definite  
477 conclusions. This study is clear in this limitation, as the number of subjects with important  
478 missing data in multiple clinical features was high in the AGP dataset, reducing analytical power,  
479 and thus only two stable clusters could be defined. The next research steps will necessarily have  
480 to involve overcoming limited clinical information and merging challenges between available  
481 datasets, like AGRE and the Simons Foundation Autism Research Initiative (SFARI), so that  
482 models established for biological predictions can be useful in clinical settings. On the other hand,

483 while genomic information gets easier and cheaper to collect, improvements are also necessary  
484 regarding GO annotations; a large number of subjects with phenotypic subgroup data did not  
485 have sufficient GO information content to be useful for classifier predictions.

## 486 **Conclusion**

487 Overall, the present approach is proof of concept that genotype-phenotype correlations can be  
488 established in ASD, and that biological processes can predict multidimensional clinical  
489 phenotypes. Importantly, it highlights the usefulness of machine learning approaches that take  
490 advantage of multidimensional measures for the construction of more homogeneous clinical  
491 profiles. It further stresses the need to overcome the limitations of analyzing individual gene  
492 variants in favor of considering biological processes disrupted by an heterogeneous set of gene  
493 variants. The results stress two major requisites for translation of genomic information into  
494 useful clinical applications: that study datasets include detailed and complete clinical  
495 information, and that databases containing biological process information are rigorously and  
496 extensively curated. Identification of biological processes for specific clinical subgroups will be  
497 important to discover physiological targets for pharmacological therapy that can be efficient for  
498 subgroups of patients. This strategy can equally become very useful in clinical settings, for  
499 predicting outcomes and planning interventions for subgroups of patients whose specific patterns  
500 of clinical presentation are defined by the genes disrupted by specific genetic variants.

501

502

503

504

505

506

507

508

509

510

511  
512  
513  
514  
515  
516  
517  
518  
519  
520  
521  
522  
523  
524  
525  
526  
527  
528  
529  
530  
531  
532  
533  
534

## Declarations

### **Ethics approval and consent to participate**

Not applicable

### **Consent for publication**

Not applicable

### **Availability of data and materials**

The datasets used in this study are from Autism Genome Project (AGP), which are available at dbGaP database.

### **Competing interests**

The authors declare that they have no competing interests.

### **Funding**

Work was supported by UID/MULTI/04046/2013 centre grant from FCT, Portugal (to BioISI) and MA, is recipient of a fellowship from BioSys PhD programme (Ref: SFRH/BD/52485/2014) from FCT (Portugal). Patients and parents were genotyped in the context of the Autism Genome Project (AGP), funded by NIMH, HRB, MRC, Autism Speaks, Hilibrand Foundation, Genome Canada, OGI, and CIHR.

### **Acknowledgements**

We acknowledge the families who participated in these projects.

### **Authors' contributions**

All the authors consented to the submission. MA performed all the analysis and drafted the manuscript. AMV and FMC conceived the study and review the manuscript. Other authors, HFMCM, ARM, JXS, JV, CR and GO proofread the manuscript and helped in understanding the data.

535

## References

- 536 1. American Psychiatric Association. Cautionary Statement for Forensic Use of DSM-5.  
537 Diagnostic Stat Man Ment Disord 5th Ed. 2013;:280.  
538 doi:10.1176/appi.books.9780890425596.744053.
- 539 2. Christensen DL, Baio J, Braun KVN, Bilder D, Charles J, Constantino JN, et al. Prevalence  
540 and Characteristics of Autism Spectrum Disorder Among Children Aged 8 Years — Autism and  
541 Developmental Disabilities Monitoring Network, 11 Sites, United States, 2012. *MMWR Surveill*  
542 *Summ.* 2016;65:1–23. doi:10.15585/mmwr.ss6503a1.
- 543 3. Devlin B, Scherer SW. Genetic architecture in autism spectrum disorder. *Curr Opin Genet*  
544 *Dev.* 2012;22:229–37. doi:10.1016/j.gde.2012.03.002.
- 545 4. Croen LA, Zerbo O, Qian Y, Massolo ML, Rich S, Sidney S, et al. The health status of adults  
546 on the autism spectrum. *Autism.* 2015;19:814–23.
- 547 5. Matson JL, Cervantes PE. Commonly studied comorbid psychopathologies among persons  
548 with autism spectrum disorder. *Research in Developmental Disabilities.* 2014;35:952–62.
- 549 6. Oliveira G, Ataíde A, Marques C, Miguel TS, Coutinho AM, Mota-Vieira L, et al.  
550 Epidemiology of autism spectrum disorder in Portugal: prevalence, clinical characterization, and  
551 medical conditions. *Dev Med Child Neurol.* 2007;49:726–33. doi:10.1111/j.1469-  
552 8749.2007.00726.x.
- 553 7. Tick B, Bolton P, Happé F, Rutter M, Rijdsdijk F. Heritability of autism spectrum disorders: A  
554 meta-analysis of twin studies. *J Child Psychol Psychiatry Allied Discip.* 2016;57:585–95.
- 555 8. Colvert E, Tick B, McEwen F, Stewart C, Curran SR, Woodhouse E, et al. Heritability of  
556 autism spectrum disorder in a UK population-based twin sample. *JAMA Psychiatry.*  
557 2015;72:415–23.
- 558 9. Klei L, Sanders SJ, Murtha MT, Hus V, Lowe JK, Willsey AJ, et al. Common genetic  
559 variants, acting additively, are a major source of risk for autism. *Mol Autism.* 2012;3:9.  
560 doi:10.1186/2040-2392-3-9.
- 561 10. Chawarska K, Macari S, Shic F. Decreased spontaneous attention to social scenes in 6-  
562 month-old infants later diagnosed with autism spectrum disorders. *Biol Psychiatry.* 2013;74:195–  
563 203.
- 564 11. Geschwind DH, State MW. Gene hunting in autism spectrum disorder: On the path to  
565 precision medicine. *The Lancet Neurology.* 2015;14:1109–20.
- 566 12. Girirajan S, Rosenfeld JA, Coe BP, Parikh S, Friedman N, Goldstein A, et al. Phenotypic  
567 Heterogeneity of Genomic Disorders and Rare Copy-Number Variants. *N Engl J Med.*  
568 2012;367:1321–31. doi:10.1056/NEJMoa1200395.
- 569 13. Liu L, Lei J, Roeder K. Network assisted analysis to reveal the genetic basis of autism. *Ann*  
570 *Appl Stat.* 2015;9:1571–600.

- 571 14. Krishnan A, Zhang R, Yao V, Theesfeld CL, Wong AK, Tadych A, et al. Genome-wide  
572 prediction and functional characterization of the genetic basis of autism spectrum disorder. *Nat*  
573 *Neurosci.* 2016;19:1454–62. doi:10.1038/nn.4353.
- 574 15. Mahfouz A, Ziats MN, Rennert OM, Lelieveldt BPF, Reinders MJT. Shared Pathways  
575 Among Autism Candidate Genes Determined by Co-expression Network Analysis of the  
576 Developing Human Brain Transcriptome. *J Mol Neurosci.* 2015;57:580–94. doi:10.1007/s12031-  
577 015-0641-3.
- 578 16. Noh HJ, Ponting CP, Boulding HC, Meader S, Betancur C, Buxbaum JD, et al. Network  
579 Topologies and Convergent Aetiologies Arising from Deletions and Duplications Observed in  
580 Individuals with Autism. *PLoS Genet.* 2013;9.
- 581 17. Correia C, Oliveira G, Vicente AM. Protein interaction networks reveal novel autism risk  
582 genes within GWAS statistical noise. *PLoS One.* 2014;9:1–11.
- 583 18. Pinto D, Pagnamenta AT, Klei L, Anney R, Merico D, Regan R, et al. Functional Impact of  
584 Global Rare Copy Number Variation in Autism Spectrum Disorder. *Nature.* 2010;466:368–72.  
585 doi:10.1038/nature09146.Functional.
- 586 19. APA. American Psychiatric Association Diagnostic and Statistical Manual of Mental  
587 Disorders (DSM-IV). SpringerReference. 2000;:Fifth Edition. Arlington, VA.  
588 doi:10.1007/SpringerReference\_179660.
- 589 20. Lord C, Rutter M, Le Couteur A. Autism Diagnostic Interview-Revised: A revised version of  
590 a diagnostic interview for caregivers of individuals with possible pervasive developmental  
591 disorders. *J Autism Dev Disord.* 1994;24:659–85.
- 592 21. Lord C, Rutter M, Goode S, Heemsbergen J, Jordan H, Mawhood L, et al. Autism  
593 diagnostic observation schedule: A standardized observation of communicative and social  
594 behavior. *J Autism Dev Disord.* 1989;19:185–212.
- 595 22. Sparrow S, Balla D, Cicchetti D. The Vineland Adaptive Behavior Scales: Interview edition,  
596 survey. In: *Major psychological assessment instruments.* 1984. p. 199–231.
- 597 23. Gotham K, Pickles A, Lord C. Standardizing ADOS scores for a measure of severity in  
598 autism spectrum disorders. *J Autism Dev Disord.* 2009;39:693–705.
- 599 24. Stekhoven DJ, Bühlmann P. Missforest-Non-parametric missing value imputation for mixed-  
600 type data. *Bioinformatics.* 2012;28:112–8.
- 601 25. Breiman L. Random forests. *Mach Learn.* 2001;45:5–32.
- 602 26. Rokach L, Maimon O. Clustering Methods. *Data Min Knowl Discov Handb.* 2010;:321–52.  
603 doi:10.1007/0-387-25465-X\_15.
- 604 27. Gower JC. A General Coefficient of Similarity and Some of Its Properties. *Biometrics.*  
605 1971;27:857. doi:10.2307/2528823.
- 606 28. Murtagh F, Legendre P. Ward's Hierarchical Agglomerative Clustering Method: Which

- 607 Algorithms Implement Ward's Criterion? *J Classif.* 2014;31:274–95.
- 608 29. Rousseeuw PJ. Silhouettes: A graphical aid to the interpretation and validation of cluster  
609 analysis. *J Comput Appl Math.* 1987;20 C:53–65.
- 610 30. Maechler M, Rousseeuw P, Struyf A, Hubert M, Hornik K. Cluster Analysis Basics and  
611 Extensions. R package version 2.0.1. 2015. [http://cran.r-](http://cran.r-project.org/web/packages/cluster/index.html)  
612 [project.org/web/packages/cluster/index.html](http://cran.r-project.org/web/packages/cluster/index.html).
- 613 31. Shaikh TH, Gai X, Perin JC, Glessner JT, Xie H, Murphy K, et al. High-resolution mapping  
614 and analysis of copy number variations in the human genome: A data resource for clinical and  
615 research applications. *Genome Res.* 2009;19:1682–90. doi:10.1101/gr.083501.108.
- 616 32. Cooper GM, Coe BP, Girirajan S, Rosenfeld JA, Vu TH, Baker C, et al. A copy number  
617 variation morbidity map of developmental delay. *Nat Genet.* 2011;43:838–46.  
618 doi:10.1038/ng.909.
- 619 33. MacDonald JR, Ziman R, Yuen RKC, Feuk L, Scherer SW. The Database of Genomic  
620 Variants: A curated collection of structural variation in the human genome. *Nucleic Acids Res.*  
621 2014;42.
- 622 34. Parikshak NN, Luo R, Zhang A, Won H, Lowe JK, Chandran V, et al. Integrative functional  
623 genomic analyses implicate specific molecular pathways and circuits in autism. *Cell.*  
624 2013;155:1008–21. doi:10.1016/j.cell.2013.10.031.
- 625 35. Reimand J, Arak T, Adler P, Kolberg L, Reisberg S, Peterson H, et al. g:Profiler—a web  
626 server for functional interpretation of gene lists (2016 update). *Nucleic Acids Res.*  
627 2016;44:W83–9.
- 628 36. Supek F, Bošnjak M, Škunca N, Šmuc T. Revigo summarizes and visualizes long lists of  
629 gene ontology terms. *PLoS One.* 2011;6.
- 630 37. Schlicker A, Domingues FS, Rahnenführer J, Lengauer T. A new measure for functional  
631 similarity of gene products based on gene ontology. *BMC Bioinformatics.* 2006;7:302.  
632 doi:10.1186/1471-2105-7-302.
- 633 38. Liaw A, Yan J, Li W, Han L, Schroff F, Criminisi A, et al. Package “randomForest.” *R news.*  
634 2015;XXXIX:54.1-54.10.
- 635 39. Kuncheva LI. On the optimality of Naïve Bayes with dependent binary features. *Pattern*  
636 *Recognit Lett.* 2006;27:830–7. doi:10.1016/j.patrec.2005.12.001.
- 637 40. Veatch OJ, Veenstra-Vanderweele J, Potter M, Pericak-Vance MA, Haines JL. Genetically  
638 meaningful phenotypic subgroups in autism spectrum disorders. *Genes, Brain Behav.*  
639 2014;13:276–85.
- 640 41. Rynkiewicz A, Schuller B, Marchi E, Piana S, Camurri A, Lassalle A, et al. An investigation  
641 of the “female camouflage effect” in autism using a computerized ADOS-2 and a test of  
642 sex/gender differences. *Mol Autism.* 2016;7:10. doi:10.1186/s13229-016-0073-0.



- 643 42. Wen Y, Alshikho MJ, Herbert MR. Pathway network analyses for autism reveal multisystem  
644 involvement, major overlaps with other diseases and convergence upon MAPK and calcium  
645 signaling. *PLoS One*. 2016;11:1–23.
- 646 43. O’Roak BJ, Stessman HA, Boyle EA, Witherspoon KT, Martin B, Lee C, et al. Recurrent de  
647 novo mutations implicate novel genes underlying simplex autism risk. *Nat Commun*. 2014;5.
- 648 44. Iossifov I, O’Roak BJ, Sanders SJ, Ronemus M, Krumm N, Levy D, et al. The contribution  
649 of de novo coding mutations to autism spectrum disorder. *Nature*. 2014;515:216–21.
- 650 45. Kawabe H, Brose N. The role of ubiquitylation in nerve cell development. *Nature Reviews*  
651 *Neuroscience*. 2011;12:251–68.
- 652 46. Nava C, Lamari F, Héron D, Mignot C, Rastetter A, Keren B, et al. Analysis of the  
653 chromosome X exome in patients with autism spectrum disorders identified novel candidate  
654 genes, including TMLHE. *Transl Psychiatry*. 2012;2:e179. doi:10.1038/tp.2012.102.

## A. Clinical data processing pipeline

Clinical reports:  
ADOS, ADI-R,  
IQ, and VABS

Clinical reports  
with imputed  
missing values

Agglomerative  
hierarchical  
clustering

### Clusters validation

Silhouette  
analysis

Internal and  
external clusters  
validation

Clusters stability

Stable and  
validated  
multidimensional  
clusters

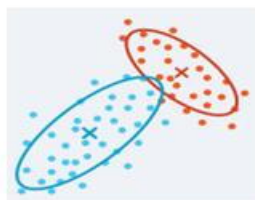

## B. CNVs data processing and functional annotation pipeline

High confidence  
and rare CNVs  
targeting brain  
genes

Merging clinical and  
CNV information

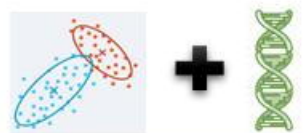

Functional  
annotation analysis

Disrupted  
biological  
processes

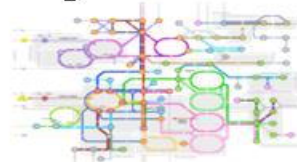

## C. Feature importance analysis

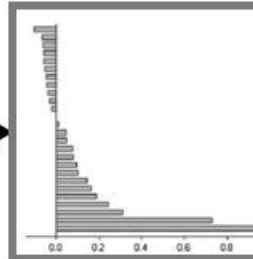

## D. Machine learning pipeline to predict clinical outcome

Classifier training  
and testing

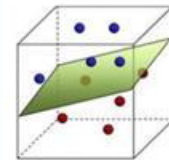

Genotype-phenotype  
associations

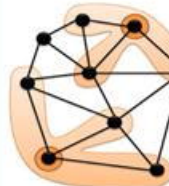

Prediction of ASD  
multidimensional  
phenotype

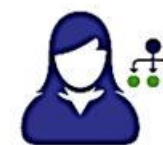

Source: http://biorxiv.org/content/10.1101/470757v1.full.pdf
