1     **Identification of biological mechanisms underlying a multidimensional ASD**  
2                                   **phenotype using machine learning**

3     Muhammad Asif<sup>1,2,3</sup>, Hugo F.M.C. Martiniano<sup>1,2</sup>, Ana Rita Marques<sup>1,2</sup>, João Xavier Santos<sup>1,2</sup>,  
4     Joana Vilela<sup>1,2</sup>, Celia Rasga<sup>1,2</sup>, Guiomar Oliveira<sup>4,5,6</sup>, Francisco M. Couto<sup>3</sup>, Astrid M. Vicente<sup>1,2\*</sup>

5     \*Correspondence: Astrid M. Vicente, Instituto Nacional de Saúde Doutor Ricardo Jorge, Avenida  
6     Padre Cruz, 1649-016 Lisboa, Portugal. Email: [astrid.vicente@insa.min-saude.pt](mailto:astrid.vicente@insa.min-saude.pt)

7     <sup>1</sup>Instituto Nacional de Saúde Doutor Ricardo Jorge, Avenida Padre Cruz, 1649-016 Lisboa,  
8     Portugal

9     <sup>2</sup>BioISI: Biosystems & Integrative Sciences Institute, Faculdade de Ciências, Universidade de  
10     Lisboa, Lisboa, Portugal

11  
12     <sup>3</sup>LASIGE, Faculdade de Ciências, Universidade de Lisboa, Lisboa, Portugal

13     <sup>4</sup>Unidade de Neurodesenvolvimento e Autismo (UNDA), Serviço do Centro de Desenvolvimento  
14     da Criança, Centro de Investigação e Formação Clínica, Hospital Pediátrico, Centro Hospitalar e  
15     Universitário de Coimbra, Coimbra, Portugal

16     <sup>5</sup>Institute for Biomedical Imaging and Life Sciences, Faculty of Medicine, Universidade de  
17     Coimbra, Coimbra, Portugal

18     <sup>6</sup>University Clinic of Pediatrics, Faculty of Medicine, University of Coimbra, Portugal

19

20

21

22

23

24

## Abstract

25 The complex genetic architecture of Autism Spectrum Disorder (ASD) and its heterogeneous  
26 phenotype make molecular diagnosis and patient prognosis challenging tasks. To establish more  
27 precise genotype-phenotype correlations in ASD, we developed a novel machine learning  
28 integrative approach, which seeks to delineate associations between patients' clinical profiles and  
29 disrupted biological processes inferred from their Copy Number Variants (CNVs) that span brain  
30 genes. Clustering analysis of relevant clinical measures from 2446 ASD cases in the Autism  
31 Genome Project identified two distinct phenotypic subgroups. Patients in these clusters differed  
32 significantly in ADOS-defined severity, adaptive behaviour profiles, intellectual ability and  
33 verbal status, the latter contributing the most for cluster stability and cohesion. Functional  
34 enrichment analysis of brain genes disrupted by CNVs in these ASD cases identified 15  
35 statistically significant biological processes, including cell adhesion, neural development,  
36 cognition and polyubiquitination, in line with previous ASD findings. A Naive Bayes classifier,  
37 generated to predict the ASD phenotypic clusters from disrupted biological processes, achieved  
38 predictions with a high Precision (0.82) but low recall (0.39), for a subset of patients with higher  
39 biological Information Content scores. This study shows that milder and more severe clinical  
40 presentations can have distinct underlying biological mechanisms. It further highlights how  
41 machine learning approaches can reduce clinical heterogeneity using multidimensional clinical  
42 measures, and establish genotype-phenotype correlations in ASD. However, predictions are  
43 strongly dependent on patient's information content. Findings are therefore a first step towards  
44 the translation of genetic information into clinically useful applications, but emphasize the need  
45 for larger datasets with very complete clinical and biological information.

46

## Keywords

47 Autism Spectrum Disorder (ASD), machine learning, integrative systems medicine,  
48 genotype/phenotype associations, ASD heterogeneity, integrating data, CNVs

49

50

51

52

## Introduction

53 Autism Spectrum Disorder (ASD) is a neurodevelopmental disorder that manifests with  
54 persistent deficits in social communication and interaction, and unusual or repetitive behaviour  
55 and/or restricted interests [1]. ASD presents a highly heterogeneous clinical phenotype and  
56 frequently co-occurs with other comorbidities, such as Intellectual Disability (ID), epilepsy and  
57 Attention Deficit Hyperactivity Disorder (ADHD) [2–6]. Heritability estimates indicate a strong  
58 genetic influence in ASD aetiology [7–9], however reliable genetic markers for the disease are  
59 unavailable. ASD is diagnosed through neurodevelopmental assessment, which can be  
60 challenging especially in the case of very young children. Improving early diagnosis and  
61 prognosis using biological markers with a robust predictive power would provide an advantage  
62 to young patients, who benefit the most from an early start of specific intervention [10].

63 Copy Number Variant (CNV) screening is nowadays widely used for etiological diagnosis, with  
64 causative genetic alterations identified in approximately 25% of ASD cases [11]. A large number  
65 of rare genetic variants have been implicated in ASD, and the wide genetic heterogeneity that  
66 characterizes this disorder likely contributes to phenotypic variability in ASD patients [12].  
67 Integrative pathway and network analysis of large scale ASD genomic studies have advanced  
68 significantly the identification of disrupted biological processes [13–17]; however, our  
69 understanding of the biological meaning of the large number of putative pathogenic variants,  
70 their phenotypic manifestations, and the reliable interpretation of many genetic findings for  
71 clinical application is still lagging.

72 To improve our ability to infer clinical meaning from rare CNVs in ASD, for eventual  
73 application as biological markers, we developed a machine learning-based approach involving  
74 the integration of gene functional annotations and clinical phenotypes. Our approach was  
75 developed in four steps, namely: 1) definition of clinically distinct subgroups in ASD cases; 2)  
76 discovery of functionally enriched biological processes defined by rare CNVs disrupting brain-  
77 expressed genes in the same ASD cases; 3) assessment of the contribution of disrupted biological  
78 processes for classification of ASD phenotypes; 4) design and predictive effectiveness  
79 characterization of a machine learning classifier for clinical outcome in ASD patients.

80

81

## Methods

82 Figure 1 shows the graphical representation of the overall methodology, described in detail  
83 below.

84

85 Figure 1: Integrative systems medicine approach to identify complex genotype-phenotype  
86 associations. Clinical and genetic data from the Autism Genome Project (AGP) was used in this  
87 study **(A)** Clinical data analysis processing: clinical data comprises reports of ASD diagnosis and  
88 neurodevelopmental assessment instruments. Agglomerative Hierarchical Clustering (AHC) was  
89 used to identify clinically similar subgroups of individuals in stable, validated clusters, defined  
90 by multiple clinical measures. **(B)** CNV data processing: rare high confidence CNVs previously  
91 identified by the AGP, targeting brain-expressed genes, were retained for analysis. CNV data  
92 was merged with clinical data from clustered ASD subjects for a final list of CNVs targeting  
93 brain genes. **(C)** Functional annotation analysis: Biological processes defined by brain-expressed  
94 genes targeted by CNVs were obtained using g:Profiler. **(D)** Classifier design: A Naive Bayes  
95 machine learning classifier was trained and tested on patient's data, to predict the phenotypic clustering of  
96 patients from biological processed disrupted by rare CNVs targeting brain-expressed genes.

### 97 • **Participants**

98 The ASD dataset used in this study was obtained from the Autism Genome Project (AGP) [18]  
99 database, and comprises CNV data and clinical information from 2446 ASD patients. The AGP  
100 was an international collaborative effort from over 50 different institutions to identify risk genes  
101 for ASD. The group of individuals with phenotypic information from clustering and rare CNV  
102 data, used in final analysis included 1213 males (83.4%) and 144 females (10.6%).

### 103 • **ASD diagnosis, clinical assessment instruments and clinical features**

104 Individuals meeting criteria defined by the Diagnostic and Statistical Manual of Mental  
105 Disorders IV (DSM-IV) [19] and the thresholds for Autism or ASD from the Autism Diagnostic  
106 Interview-Revised (ADI-R) [20] and the Autism Diagnostic Observation Schedule (ADOS) were  
107 classified as ASD cases [21]. The AGP defined a phenotypic classification system based on the  
108 combined ADI-R and ADOS diagnosis, categorizing subjects into Strict (meeting thresholds for

109 Autism by the ADI-R and ADOS), Broad (meeting thresholds for Autism from one instrument  
110 and ASD from the other) and Spectrum (meeting thresholds for Autism from at least one  
111 instrument or ASD from both). Individuals with an ASD diagnosis from only one instrument and  
112 no information from the other, or not meeting thresholds for Autism or ASD from one of the  
113 instruments, regardless from the classification from the other, were not included in the study.  
114 Clinical measures used in this study were retrieved from the AGP database, including the ADIR  
115 verbal status, ADOS severity score, Vineland Adaptive Behaviour Scales (VABS) [22] subscales  
116 and an Intelligence Quotient (IQ).

117 The ADI-R verbal status is a dichotomized measure indicating the verbal status of the individual  
118 at evaluation. The ADOS severity metric ranges from 1 to 10 and is calculated from ADOS  
119 modules 1 to 3 raw scores [23]. As there is no algorithm available to calculate ADOS severity  
120 score for ADOS module 4 reports, which is applied only to adolescents and adults, subjects with  
121 the ADOS module 4 (N= 149) were dropped from further processing. The severity score  
122 distribution is collapsed into three categories, namely Autism (severity scores ranging from 6 to  
123 10), ASD (severity scores ranging from 4 to 5) and Non-Spectrum (severity scores from 1 to 3),  
124 which reflect the mapping of the severity metric onto raw ADOS scores. The ADOS Non-  
125 spectrum category includes individuals with a mild phenotype, and in this study 125 individuals  
126 with a Non-spectrum ADOS severity score fell within the Spectrum phenotypic class from the  
127 AGP, meaning they met thresholds for autism from the ADI-R, and were thus included.

128 The VABS is used to assess adaptive functioning of individuals and consists of three subscales,  
129 namely, socialization, communication and daily living skills scores, and also computes a  
130 composite score. Subjects with VABS scores  $\leq 70$  were classified in a dysfunctional adaptive  
131 behavior category, for all subscales. IQ scores of ASD cases were also retrieved from the AGP  
132 database, and categorized with the following thresholds:  $IQ > 70$  normal,  $50 < IQ < 70$  mild  
133 intellectual disability,  $IQ < 50$  severe intellectual disability.

134 Clinical reports from the ASD patients were examined for missing values, and clinical features  
135 with more than 70% information were retained for the analysis. To minimise missing value  
136 imputation bias, individuals with missing values above this threshold for more than two clinical  
137 features were also excluded. Completeness of each clinical feature is reported in Table S1  
138 (Additional file 1). Missing values were imputed using the missForest [24] R package that

139 implements the Random Forest [25] algorithm, a decision tree-based supervised machine  
140 learning method. Imputation error was assessed using the normalised global Proportion of  
141 Falsely Classification (PFC), and the missing values imputation error was 0.12.

142 • **Clustering analysis of ASD clinical data**

143 To focus on core domains of ASD symptoms, verbal skills, disease severity, adaptive behavior  
144 and intellectual levels, which strongly condition prognosis, were selected for further analysis.  
145 Verbal status was obtained from the ADI-R, ASD severity scored from the ADOS, adaptive  
146 functioning from the VABS, using its three subdomains, and a performance IQ category from the  
147 IQ assessment contributed by participating sites to the AGP database. Other IQ domains had too  
148 many missing values to be used. The Agglomerative Hierarchical Clustering (AHC) [26] method  
149 was used to identify independent phenotypic subgroups from the selected clinical features.  
150 Correlations between clinical features were assessed using the Pearson method, and features with  
151 a correlation value of  $> 0.75$  were considered correlated. The Gower [27] metric was used to  
152 calculate the distance matrix from the patient's clinical data. To normalise the effect of highly  
153 correlated variables on clustering, the weight for correlated variables (VABS subscales of  
154 socialisation, communication, and daily living skills) was reduced to half during distance matrix  
155 calculation. To identify phenotypic subgroups, the AHC method using Ward2 [28] criteria was  
156 applied to the distance matrix.

157 To assess the contributions of each clinical feature in defining the clusters, we excluded one  
158 feature at a time, re-performed the clustering and observed the changes in Silhouette values of  
159 both clusters. For this purpose, we selected Silhouette value as an evaluation metric because it  
160 was also used to define outliers in clinical data. A decrease in the Silhouette value of a cluster  
161 after removing one feature indicates its importance in defining this cluster and vice versa.

162 • **Goodness of clustering assessment**

163 A Silhouette method [29] was employed to estimate the goodness of the clustering results. The  
164 Silhouette value for each individual shows how well the individual is clustered, and ranges from  
165 -1 to 1, with individuals scoring below 0 considered as wrongly clustered. In addition, the  
166 Silhouette value for each cluster was derived, and clusters with Silhouette value of  $> 0.25$  were

167 considered as true clusters. Bootstrapping with 1000 iterations was used to measure the stability  
168 of clusters, where a boot mean value above 0.85 corresponds to stable clusters. All clustering  
169 analysis was performed in R environment, using Cluster [30] and FPC packages.

170 • **Functional enrichment analysis**

171 Genotyping and CNV calling methods for the AGP ASD subjects (N=2446) were previously  
172 described [18]. CNVs called by any two algorithms (high confidence CNVs) and above 30kb in  
173 size were retained for further analysis. To screen for rare CNVs (<1% in control population)  
174 CNV frequencies in control populations were estimated using the genotypes from the studies by  
175 Sheikh et al. [31] (N = 1320) and Cooper et al. [32] (N = 8329), identified using the same  
176 genotyping platform [18]. Control genotypes were obtained from the Database of Genomic  
177 Variants (DGV) [33].

178 To focus CNV selection on variants spanning brain-expressed genes, avoiding *a priori*  
179 hypotheses from ASD candidate gene assumptions, an extensive list comprising 15585 brain-  
180 expressed genes was obtained from Parikshak et al. [34]. The brain-expressed gene list was  
181 prepared from brain RNA-seq data, collected at thirteen different developmental stages,  
182 including genes expressing during early brain developmental phase. The full criteria and  
183 parameters used to define the brain-expressed gene list were previously described [34]. .

184 The g:Profiler [35] tool was employed to identify biological processes enriched for brain-  
185 expressed genes spanned by rare CNVs in ASD individuals. g:Profiler implements a  
186 hypergeometric test to estimate the statistical significance of enriched biological processes,  
187 followed by multiple corrections for the tested hypotheses using the Benjamini-Hochberg  
188 procedure. g:Profiler uses Gene Ontology (GO) data to find the biological annotations for input  
189 genes.

190 The GO tool contains a Directed Acyclic Graph (DAG) structure with a clear hierarchical parent-  
191 to-child relationship between GO terms. Because of this DAG structure, functional enrichment  
192 analysis can result in redundant GO terms, which may lead to high correlations between GO  
193 terms. To minimise the correlations between GO terms, the Revigo [36] tool was employed to  
194 redundant GO results. Revigo uses the methods of semantic similarity to measure similarities



195 between GO terms. The SimRel [37] method was used to calculate similarities between GO  
196 terms, and terms with a similarity score of  $> 0.7$  were grouped.

197 • **Feature importance assessment**

198 The mean decrease in accuracy of the Random Forest algorithm was used to compute the  
199 importance score of each disrupted biological process for categorizing ASD subjects into defined  
200 phenotypic clusters. A stratified ten-fold cross-validation quan

201 tifies the importance of all features. The importance score of all disrupted biological processes  
202 was recorded at each fold. A final importance score for each biological process was calculated by  
203 averaging their importance score values across all the ten folds. Random Forest was  
204 implemented using randomForst R package [38].

205 • **Classifier learning and cross-validation**

206 A Naive Bayes [39] machine learning method was employed to predict the ASD phenotypic  
207 group, defined by the clustering analysis, from biological processes disrupted by rare CNVs.  
208 This method employs the Bayes theorem of probability for training and testing of the model, and  
209 the algorithm was implemented using the klaR R package with default parameters. Precision,  
210 recall, specificity and F-score were used as evaluation measures. To train and test the Naive  
211 Bayes, a stratified five-fold cross-validation approach was used, in which data was first split into  
212 five equal subsets with equal class probabilities; a Naive Bayes model was trained on any four  
213 subsets, and the remaining subset was used as the test set. This process was repeated five times  
214 and each time a different subset was used as test set. For each repetition, the model performance  
215 was estimated and mean values for precision, recall, specificity and F-score were reported. The  
216 Naive Bayes classifier was trained on patient's data by using the "more severe" cluster as the  
217 positive class and the "less severe" cluster as the negative class.

218 The Information Content (IC) from each individual represents the level of specificity of  
219 biological processes disruption, and was derived by summing the IC values of all the biological  
220 processes disrupted in each individual. IC is a numerical value that describes the specificity of a  
221 GO term using its position in the GO DAG structure.

222



223

## Results

### 224 • Identification of ASD clusters defined by clinical phenotype

225 A total of 1817 ASD subjects from the AGP were retained for analysis after assessment of  
226 missing values in clinical features. Agglomerative hierarchical clustering analysis of clinical  
227 observations from these patients initially identified two phenotypically independent clusters. To  
228 minimise the phenotypic complexity and define the most stable and cohesive clusters, weakly  
229 clustered individuals with a Silhouette value less than 0.300 (representing a balance between  
230 number of individuals lost and goodness of clustering) were excluded from the clustering  
231 analysis. After removal of weakly or wrongly clustered individuals, cluster 1 contained 903 ASD  
232 cases, while cluster 2 comprised 494 patients (Table 1). Elimination of the loosely clustered  
233 individuals resulted in more stable and cohesive clusters, with high values for clusters stability  
234 and reduced average distance between the two individuals in a cluster (Table 1).

235 Table 1: Clustering validation, after removal of weakly clustered individuals.

| Clusters validation measures          | Cluster 1 | Cluster 2 |
|---------------------------------------|-----------|-----------|
| Clusters size (N)                     | 903       | 494       |
| Average distance between two patients | 0.235     | 0.231     |
| Silhouette value                      | 0.567     | 0.579     |
| Average Silhouette of both clusters   | 0.571     |           |
| Cluster stability                     | 0.998     | 0.996     |

236

237 Overall, the cluster validation through the Silhouette method and bootstrapping showed that both  
238 clusters were true and consistent.

### 239 • Clinical interpretations of the clusters

240 All clinical measures differed significantly between the two clusters, as shown in Table 2.  
241 Cluster 1 (Additional file 1: black circles in Figure S1) includes a higher number of individuals,  
242 who generally exhibited a milder clinical phenotype, while Cluster 2 (Additional file 1: red  
243 triangles in Figure S1) included a higher percentage of subjects with severe dysfunction. All  
244 individuals in Cluster 1 were verbal according to the ADI-R, while Cluster 2 included only non-

245 verbal cases. The mean age of ADI-R assessment was 7.7 years, an age when verbal status is  
246 generally well established. Furthermore, the mean age of individuals in Cluster 1 (mean age  
247 8.02) and Cluster 2 (mean age 7.01) did not significantly differ.

248 For all VABS sub-domains, roughly half of the subjects in Cluster 1 were in the normal range;  
249 conversely, over 97% of individuals belonging to Cluster 2 showed dysfunctional adaptive  
250 behaviour. Consistent with the other clinical measures, over 96% of cases from Cluster 1, but  
251 less than one third in Cluster 2, scored at the normal level in performance IQ, while a much  
252 higher percentage of ASD cases from Cluster 2 than from Cluster 1 presented with a  
253 performance IQ in the range of severe intellectual disability.

254 Regarding the ADOS severity score, approximately 14% of the individuals in Cluster 1 were  
255 assigned to the milder category of the ADOS severity score (“Non-spectrum” for ADOS, but  
256 scoring positive for “Autism” in the ADI-R, and therefore classified in the AGP “Spectrum”  
257 phenotypic class, see methods). Conversely, none of the individuals in Cluster 2 scored in this  
258 category. On the other hand, a significantly higher percentage of cases in Cluster 2 (20.65%)  
259 than individuals in Cluster 1 (7.09%) scored in the intermediate ASD severity category. It is  
260 noteworthy that both clusters show a similarly high percentage of individuals scoring in the  
261 “Autism” ADOS severity category. This is not surprising since this broad category (scores  
262 ranging from 6 to 10) comprises all subjects classified in the Strict AGP phenotype class but also  
263 a large proportion of individuals in the AGP Broad phenotype class. The “Autism” ADOS  
264 severity score therefore targets a subset of the study population that can be quite heterogeneous  
265 in phenotypic presentation. Corroborating this, we found that the “Autism” category of the  
266 ADOS severity score is not significantly associated with the clusters ( $\chi^2 = 0.15$ ,  $p = 0.901$ ,  $df =$   
267  $2$ ), even though overall there is a significant association of the overall ADOS severity scores  
268 (Table 2).

269

270

271

272

273 Table 2: Clusters 1 and 2 statistics for each clinical measure.

| Clinical measure         | Clinically defined categories                       | Cluster 1 N (%) | Cluster 2 N (%) | <i>p</i> -value       |
|--------------------------|-----------------------------------------------------|-----------------|-----------------|-----------------------|
| ADIR verbal status       | ADI-R-non verbal                                    | 0 (0)           | 494 (100)       | <0.00001 <sup>a</sup> |
|                          | ADI-R-verbal                                        | 903 (100)       | 0 (0)           |                       |
| ADOS severity score      | ADOS severity score Autism (score 6-10)             | 714 (79.07)     | 392 (79.35)     | <0.00001 <sup>b</sup> |
|                          | ADOS severity score ASD (score 4-5)                 | 64 (7.09)       | 102 (20.65)     |                       |
|                          | ADOS severity score Non-spectrum (score 1-3)        | 125 (13.84)     | 0 (0)           |                       |
| VABS communication       | Dysfunctional VABS communication (score ≤ 70)       | 307 (34)        | 493 (99.8)      | <0.00001 <sup>a</sup> |
|                          | Normal VABS communication (score > 70)              | 596 (66)        | 1 (0.2)         |                       |
| VABS daily living skills | Dysfunctional VABS daily living skills (score ≤ 70) | 478 (52.94)     | 484 (97.98)     | <0.00001 <sup>b</sup> |
|                          | Normal VABS daily living skills (score > 70)        | 425 (47.07)     | 10 (2.02)       |                       |
| VABS socialization       | Dysfunctional VABS socialization (score ≤ 70)       | 497 (55.04)     | 490 (99.19)     | <0.00001 <sup>a</sup> |
|                          | Normal VABS socialization (score > 70)              | 406 (44.96)     | 4 (0.81)        |                       |
| Performance IQ Scale     | Severe disability (score <50)                       | 2 (0.22)        | 218 (44.13)     | <0.00001 <sup>b</sup> |
|                          | Moderate disability (score ≥ 50 and ≤70)            | 31 (3.43)       | 125 (25.3)      |                       |
|                          | Normal ability (score > 70)                         | 870 (96.35)     | 151 (30.57)     |                       |
| Gender                   | Male                                                | 830 (91.92)     | 417 (84.41)     | 0.000015 <sup>b</sup> |
|                          | Female                                              | 73 (8.08)       | 77 (15.59)      |                       |

274 <sup>a</sup>Fisher Exact Test, <sup>b</sup>Chi-Square test

275 Both clusters were strongly dominated by the male gender, partly because of the high percentage  
 276 of males in the dataset after the elimination of weakly or wrongly clustered individuals.  
 277 However, the percentage of males was higher in cluster 1, representing the milder phenotype,  
 278 consistent with general observations that male to female ratios are higher in datasets that  
 279 comprise more high- function ASD individuals.

280 Analysis of the contribution of each clinical feature in defining clusters showed that the main  
 281 contributor was the ADIR verbal status variable (Additional file 1: Table S2). The VABS  
 282 subscales had a strong effect on Cluster 1 but a modest role in defining Cluster 2. Performance  
 283 IQ also contributed more to Cluster 1 whereas for Cluster 2 it has the least effect. The ADOS

284 severity score did not have a major role in defining either cluster, as indicated by the similar high  
285 percentage of subjects scoring within the range of “Autism” in the ADOS severity scale in both  
286 clusters. Similarly, gender was not an important contributor to the definition of either cluster.

287 • **Disrupted biological processes from brain-expressed genes targeted by rare CNVs**

288 CNVs (N=129754) identified in 2446 subjects with ASD were filtered to select rare, high  
289 confidence CNVs, over 30 Kb in size and that contained complete or partial brain-expressed  
290 gene sequences. The selected high confidence, rare CNVs (N=12683) disrupted 4025 brain-  
291 expressed genes in 2414 subjects with ASD (86.8% males and 13.2% females).

292 Phenotypic cluster and rare CNV data was complete for 1357 individuals with ASD, and  
293 available for integration. Functional enrichment analysis of rare CNVs targeting brain-expressed  
294 genes (N=2738) in 1357 patients identified 17 statistically significant biological processes  
295 (Additional file 1: Table S3). g:Profiler did not recognize 187 genes from the input list.

296 The redundancy of GO terms in functional enrichment analysis, caused by overlapping  
297 annotations in ancestors and descendent terms in the DAG structure of GO, was reduced by  
298 grouping the terms that had a semantic similarity score higher than 0.7 (Additional file 1: Table  
299 S3). The Revigo tool used to reduce redundancy did not recognise one biological process  
300 (*Plasma membrane bounded cell projection organization*). After redundancy reduction, 16  
301 biological processes remained (Table 3), with the *Calcium-dependent cell-cell adhesion via*  
302 *plasma membrane cell adhesion molecules* biological process merged with *Homophilic cell*  
303 *adhesion via plasma membrane adhesion molecules* (similarity score = 0.76).

304 The most significant biological process identified in this dataset was *Homophilic cell adhesion*  
305 *via plasma membrane adhesion molecules*, which includes 53 brain-expressed genes disrupted  
306 by the selected CNVs. The ten most significant biological processes were related to cell adhesion  
307 and cellular organization, and also included nervous system development and protein  
308 polyubiquitination (Table 3). Moreover, two significant biological processes were related to  
309 behavior and cognition.

310

311 Table 3: Statistically significant enriched biological processes for CNVs spanning brain-  
312 expressed genes (N=2738). FDR: False Discovery Rate

| Biological processes                                            | Enriched genes (N) | FDR <i>p</i> -value |
|-----------------------------------------------------------------|--------------------|---------------------|
| Homophilic cell adhesion via plasma membrane adhesion molecules | 53                 | 6.30E-09            |
| Cell-cell adhesion via plasma-membrane adhesion molecules       | 66                 | 1.70E-07            |
| Cellular component organization or biogenesis                   | 944                | 5.70E-05            |
| Cellular component organization                                 | 915                | 7.00E-05            |
| Cellular component biogenesis                                   | 475                | 0.00066             |
| Cellular component assembly                                     | 434                | 0.00177             |
| Nervous system development                                      | 363                | 0.00215             |
| Organelle organization                                          | 562                | 0.00475             |
| Protein polyubiquitination                                      | 64                 | 0.00592             |
| Cell projection organization                                    | 231                | 0.00836             |
| Cellular localization                                           | 418                | 0.0091              |
| Single-organism behavior                                        | 83                 | 0.0196              |
| Regulation of cellular component organization                   | 364                | 0.0257              |
| Plasma membrane bounded cell projection organization            | 223                | 0.0282              |
| Cognition                                                       | 56                 | 0.0364              |
| Single-organism organelle organization                          | 263                | 0.044               |

313

314 • **Biological process importance for prediction of ASD clinical phenotype**

315 The enriched biological processes and phenotypic cluster information for ASD cases were  
316 combined in a matrix to assess the predictive value of the biological processes for categorization  
317 in one of the two phenotypic clusters, broadly characterized by a milder and a more severe  
318 phenotypic presentation. The 57 individuals containing both rare CNV and cluster information  
319 that did not present any enriched biological process were excluded, so further analysis comprised  
320 1300 ASD patients.

321 Table 4 shows the ranking in importance of disrupted biological processes for categorization of  
322 subjects into ASD phenotypic clusters, computed using the Random Forest importance score  
323 function.

324 Table 4: Importance of each biological process from Random Forest in classifying ASD subjects  
325 into defined phenotypic clusters.

| Random Forest rank | Biological process                                              | Mean Decrease in Accuracy |
|--------------------|-----------------------------------------------------------------|---------------------------|
| 1                  | Regulation of cellular component organization                   | 0.052                     |
| 2                  | Cell projection organization                                    | 0.025                     |
| 3                  | Cellular component assembly                                     | 0.025                     |
| 4                  | Single organism behaviour                                       | 0.020                     |
| 5                  | Organelle organization                                          | 0.018                     |
| 6                  | Single organism organelle organization                          | 0.017                     |
| 7                  | Cellular component biogenesis                                   | 0.014                     |
| 8                  | Cognition                                                       | 0.013                     |
| 9                  | Nervous system development                                      | 0.010                     |
| 10                 | Cellular localization                                           | 0.009                     |
| 11                 | Cellular component organization                                 | 0.006                     |
| 12                 | Protein polyubiquitination                                      | 0.005                     |
| 13                 | Homophilic cell adhesion via plasma membrane adhesion molecules | 0.005                     |
| 14                 | Cell adhesion via plasma membrane adhesion molecules            | 0.005                     |
| 15                 | Cellular component organization or biogenesis                   | 0.003                     |

326

327 The importance of each biological process was calculated using the mean decrease in accuracy,  
328 computed by permuting each biological process. The feature importance analysis using Random  
329 Forest, which was trained and tested using stratified 10-fold cross-validation over the integrated  
330 dataset, revealed positive values for all features, indicating that all of the biological processes are  
331 positively contributing for classification. The most important biological process for the  
332 classification was *Regulation of cellular component organization*, with a mean decrease in  
333 accuracy of 0.052. The most significantly enriched biological process in the overall ASD dataset,  
334 *Homophilic cell adhesion via plasma membrane adhesion molecules* was ranked at position 14,  
335 indicating it is not a top contributor to phenotypic categorization of ASD subjects into the  
336 phenotypic clusters, in this population.

337 • **Predicting clinical phenotype from the biological processes disrupted by rare CNVs in**  
338 **ASD patients**

339 The Naive Bayes supervised machine learning method was trained and tested using phenotypic  
340 clustering information and the 15 biological processes inferred from rare CNVs targeting brain-  
341 expressed genes in ASD patients. The classifier was trained with the assumption that ASD  
342 subjects with a more dysfunctional clinical phenotype, subgrouped in Cluster 2, would present a  
343 different pattern of disrupted biological processes from the individuals with a milder expression  
344 of ASD phenotype in Cluster 1.

345 The Naive Bayes classifier trained on data from 1300 patients did not perform well in predicting  
346 the more dysfunctional clinical phenotype from disrupted biological processes (Table 5), with  
347 scores indicating a low accuracy of the predictive model.

348 To further dissect the information available, the biological process Information Content (IC) for  
349 each individual was calculated by summing the IC values for all the biological processes  
350 disrupted in that individual. ASD subjects in the first IC quantile (N = 325) had highest IC  
351 scores, while ASD cases belonging to fourth quantile (N = 326) contained lowest IC scores. The  
352 performance of the Naive Bayes classifier improved when only ASD subjects with higher IC  
353 were selected for analysis. Analysis of the group of individuals with highest IC (first quantile)  
354 resulted in a higher predictability of ASD clinical outcome (Table 5). The classifier trained and  
355 tested on individuals from the first two (1<sup>st</sup> and 2<sup>nd</sup>) and first three (1<sup>st</sup>, 2<sup>nd</sup>, and 3<sup>rd</sup>) quantiles also  
356 performed better than the classifier designed using the whole dataset of clusters and biological  
357 processes (Table 5).

358 Table 5: Naive Bayes performance in predicting the severe phenotype of ASD

| Data used for classification                | N          | Precision    | Recall       | Specificity  | F-score      |
|---------------------------------------------|------------|--------------|--------------|--------------|--------------|
| All ASD cases                               | 1300       | 0.221        | 0.379        | 0.655        | 0.279        |
| ASD cases from 1st quantile with highest IC | <b>325</b> | <b>0.816</b> | <b>0.389</b> | <b>0.699</b> | <b>0.526</b> |
| ASD cases from 1st and 2nd quantiles of IC  | 649        | 0.23         | 0.384        | 0.65         | 0.284        |
| ASD cases from first three quantiles of IC  | 974        | 0.29         | 0.389        | 0.672        | 0.329        |

359



360 The Naive Bayes classifier was thus able to make reasonably good predictions of ASD severity,  
361 but only for a subset of ASD individuals with higher IC. This indicates that improved GO  
362 information, as well as larger datasets with more GO information available, are needed to  
363 usefully integrate clinical and biological data.

## 364 **Discussion**

365 The discovery of diagnostic and prognostic biomarkers for ASD has the potential to improve the  
366 reliability of diagnosis at earlier stages of development, as well as the phenotypic categorization  
367 for prognosis, eventually informing personalized intervention that is particularly beneficial for  
368 very young children. However, in spite of the enormous volume of genetic information generated  
369 by genomic approaches in the past decade, the clinical diagnosis of ASD patients is still solely  
370 based on neurodevelopmental assessment. The results of many genomic tests, including CNV  
371 arrays and clinical exomes, still leave about 80% of the cases without any explanation regarding  
372 the biological pathways underlying their disease and their personal clinical presentation.

373 In this study, we developed a novel integrative approach to predict ASD phenotypes from  
374 biological processes defined by genetic alterations. Overall, our approach sought to exploit  
375 multidimensional clinical measures to define subgroups of ASD patients presenting similar  
376 clinical profiles, and then to identify the biological processes disrupted by CNVs that might  
377 predict these more homogeneous clinical patterns. For the sake of eventual clinical utility, we  
378 chose clinical measures with well-established relevance and frequently used in clinical settings,  
379 but established no other restrictions. Further, we did not set any *a priori* hypothesis for gene  
380 selection, besides being expressed in the brain.

381 The clustering of clinical data from ASD cases resulted in two subgroups that were clearly  
382 distinguishable in terms of severity of phenotype, defined by multiple clinically relevant  
383 measures including verbal status, ASD severity, adaptive function and cognitive ability. The  
384 identification of only two clusters for the clinical phenotype, with an important proportion of  
385 individuals in the AGP dataset that could not be adequately clustered was expected, as it reflects  
386 the high clinical heterogeneity of ASD. The identification of these subgroups was in line with  
387 previous results by Veatch et al. [40], who also identified two clusters differing in severity using  
388 two independent population samples, including the Autism Genetic Resource Exchange (AGRE)  
389 and also the AGP dataset. While clinical variables were not fully coincidental between the two

390 studies, we confirmed that the verbal status, ADOS-based severity, VABS-based  
391 communication, socialization and daily living skills, as well as gender, were all significantly  
392 different between clusters. We noted an unequal contribution of each clinical measure to  
393 definition of each cluster, with verbal status the main contributor and the ADOS severity score a  
394 low contributor for both clusters, while Performance IQ was mainly important for Cluster 1.

395 In our study, the larger Cluster 1 was characterized by a generally milder phenotype, with all  
396 individuals being verbal, a large proportion in the normal IQ range and significantly higher  
397 numbers of subjects scoring better in adaptive behavior subscales. Cluster 1 also showed a higher  
398 male to female ratio, as expected given the general observation that higher functioning ASD  
399 subgroups have a larger proportion of males. The smaller Cluster 2 included only non-verbal  
400 subjects, and had a higher percentage of subjects with a more dysfunctional phenotype in terms  
401 of adaptive behavior, as well as lower IQ scores. Because cognitive ability is such an important  
402 variable for prognosis, we included performance IQ as a clinical variable, in spite of the  
403 limitations related to the heterogeneity of IQ measurement tools used for patient assessment by  
404 AGP contributing sites. For the AGP dataset, an effort was previously made to rationalize the  
405 tests used, and cognitive level was established using a categorical classification provided by  
406 AGP sites in three categories, namely severe intellectual disability, mild intellectual disability  
407 and normal IQ, for verbal, performance and full scale IQ scores. Limitations were also  
408 introduced by the proportions of missing data; given the adopted control of the validity of  
409 imputation procedures, only performance IQ met the criteria for reliable imputation, so only this  
410 measure was used.

411 Because our main goal was to improve the power for phenotypic subgroup prediction by  
412 genetically defined biological processes, we focused on obtaining compact and stable clusters by  
413 using strict criteria for cluster stability to assess the goodness of clustering, at the expense of  
414 population sample dimension. As expected, the weakly clustered individuals tended to have more  
415 divergent scores across clinical measures (data not shown), and therefore were more difficult to  
416 cluster with high confidence. It is intriguing that a higher proportion of females than males was  
417 removed, suggesting that this divergence of scores is more frequent in girls. This observation  
418 generally supports recent debates on the lower adequateness of assessment criteria to the female  
419 autism phenotype [41].

420 To test the hypothesis that phenotypic subgroups have specific underlying pathological  
421 mechanisms, we first sought to identify the biological processes enriched in the gene sets  
422 disrupted by rare CNVs detected in the AGP dataset. The functional enrichment analysis  
423 conducted in this study was independent of any prior assumptions or weighting criteria of genes  
424 relative to ASD risk. To make functional enrichment analysis hypothesis-free and to let the data  
425 speak, we screened for CNVs disrupting any brain-expressed genes. The objective was to obtain  
426 a complete picture of the convergence of rare CNVs, targeting any brain-expressed genes, into  
427 biological processes relevant for brain function.

428 The biological processes identified in the functional enrichment analysis showed an overlap with  
429 putative core biological mechanisms of ASD defined by previous studies. For example, 363  
430 brain genes spanned by rare CNVs were enriched for neurodevelopment biological process and  
431 56 genes were associated with cognition process. Enrichment of nervous system development  
432 and cognition processes in ASD has been previously reported by studies using different  
433 approaches, including transcriptome analysis and co-expression networks [15] and is supported  
434 by the function of genes most consistently implicated in ASD, like *PTEN*, *RELN*, *SYNGAP1*,  
435 *ANK2*, *SCN2A* and *SHANK3* [42]. Noh et al. analysis of *de novo* CNVs spanning ASD genes  
436 also implicated cognitive processes, and showed a convergence in cellular component  
437 organization or biogenesis, cellular component assembly, and organelle organization biological  
438 processes [16]. Other studies implicated cell adhesion processes in ASD as important  
439 components of synapse formation and function (46, 47). Dysregulation of polyubiquitination was  
440 also in line with previous studies reporting an excess of variants in genes involved in  
441 ubiquitination processes, which regulate neurogenesis, neuronal migration and synapse  
442 formation, and are thus essential for brain development [43–46].

443 This biological heterogeneity parallels the extensive phenotypic heterogeneity that characterizes  
444 ASD. For this reason, we sought to identify the biological processes underlying the more  
445 homogeneous phenotypic subgroups defined by the clusters. The Random Forest algorithm was  
446 used to assess the importance of each enriched biological process in discriminating the two ASD  
447 phenotype subgroups. Feature importance analysis showed that all the biological process  
448 contributed positively to the classification of ASD severity. However, the feature importance  
449 ranking was different from the significance ranking of enriched biological processes. Despite  
450 their relevance for ASD, the top three statistically significant biological processes identified by

451 functional enrichment analysis were least important for the classification of subjects into the  
452 phenotypic milder and more dysfunctional subgroups. These findings support the concept that  
453 the integration of datasets with multidisciplinary information, including genomic and clinical  
454 data, is necessary to discover the biological mechanisms that lead to specific clusters of  
455 symptoms.

456 The Naive Bayes classifier was able to make useful predictions of ASD phenotypic subgroups  
457 from disrupted biological processes, but only for a subset of individuals for whom annotations  
458 had higher information content for the biological processes defined by the CNVs. Currently, GO  
459 contains more than 40,000 biological concepts, which are rapidly evolving with the increasing  
460 knowledge of biological phenomena and with our ability to structure this knowledge. Therefore,  
461 it is expected that the performance of the proposed classifier will improve with the progress in  
462 GO annotations.

463 Given the high clinical heterogeneity of ASD, clustering of individuals according to a  
464 multidimensional phenotype will result in subgroups with more homogeneous clinical patterns  
465 and for whom the causes of this disease are more likely to have the same underlying biological  
466 mechanism. The clustering of individuals according to multidimensional clinical symptoms *per*  
467 *se* is likely to have implication for prognosis and outcomes, as concurrent symptoms may have a  
468 synergistic effect on disease progression, and may thus also help guide clinical practice and  
469 intervention. However, thus far this perspective has been insufficiently explored, and not enough  
470 datasets are yet available with detailed clinical information that can be merged for large scale  
471 analysis. The alterations in diagnostic criteria over time and the changes in versions of  
472 instruments like the ADI-R and the ADOS create important challenges for data merging across  
473 population samples, which are needed so that sufficient statistical power is achieved for definite  
474 conclusions. This study is clear in this limitation, as the number of subjects with important  
475 missing data in multiple clinical features was high in the AGP dataset, reducing analytical power,  
476 and thus only two stable clusters could be defined. The next research steps will necessarily have  
477 to involve overcoming limited clinical information and merging challenges between available  
478 datasets, like AGRE and the Simons Foundation Autism Research Initiative (SFARI), so that  
479 models established for biological predictions can be useful in clinical settings. On the other hand,  
480 while genomic information gets easier and cheaper to collect, improvements are also necessary

481 regarding GO annotations; a large number of subjects with phenotypic subgroup data did not  
482 have sufficient GO information content to be useful for classifier predictions.

### 483 **Conclusion**

484 Overall, the present approach is proof of concept that genotype-phenotype correlations can be  
485 established in ASD, and that biological processes can predict multidimensional clinical  
486 phenotypes. Importantly, it highlights the usefulness of machine learning approaches that take  
487 advantage of multidimensional measures for the construction of more homogeneous clinical  
488 profiles. It further stresses the need to overcome the limitations of analyzing individual gene  
489 variants in favor of considering biological processes disrupted by an heterogeneous set of gene  
490 variants. The results stress two major requisites for translation of genomic information into  
491 useful clinical applications: that study datasets include detailed and complete clinical  
492 information, and that databases containing biological process information are rigorously and  
493 extensively curated. Identification of biological processes for specific clinical subgroups will be  
494 important to discover physiological targets for pharmacological therapy that can be efficient for  
495 subgroups of patients. This strategy can equally become very useful in clinical settings, for  
496 predicting outcomes and planning interventions for subgroups of patients whose specific patterns  
497 of clinical presentation are defined by the genes disrupted by specific genetic variants.

498

### 499 **Acknowledgements**

500 Work was supported by UID/MULTI/04046/2013 centre grant from Portuguese Fundação para a  
501 Ciência e Tecnologia (FCT), Portugal (to BioISI), UID/CEC/00408/2019 (LASIGE) and  
502 PTDC/CCI-BIO/28685/2017 (DeST: Deep Semantic Tagger Project) to FMC, and MA was  
503 recipient of a fellowship from BioSys PhD programme (Ref: SFRH/BD/ 52485/2014) from FCT  
504 (Portugal). Patients and parents were genotyped in the context of the Autism Genome Project  
505 (AGP), funded by NIMH, HRB, MRC, Autism Speaks, Hilibrand Foundation, Genome Canada,  
506 OGI, and CIHR. We acknowledge the families who participated in these projects.

### 507 **Conflict of Interest**

508 The authors declare that they have no conflict of interest.

509

510

## References

- 511 1. American Psychiatric Association. Cautionary Statement for Forensic Use of DSM-5.  
512 Diagnostic Stat Man Ment Disord 5th Ed. 2013;;280.  
513 doi:10.1176/appi.books.9780890425596.744053.
- 514 2. Christensen DL, Baio J, Braun KVN, Bilder D, Charles J, Constantino JN, et al. Prevalence  
515 and Characteristics of Autism Spectrum Disorder Among Children Aged 8 Years — Autism and  
516 Developmental Disabilities Monitoring Network, 11 Sites, United States, 2012. *MMWR Surveill*  
517 *Summ.* 2016;65:1–23. doi:10.15585/mmwr.ss6503a1.
- 518 3. Devlin B, Scherer SW. Genetic architecture in autism spectrum disorder. *Curr Opin Genet*  
519 *Dev.* 2012;22:229–37. doi:10.1016/j.gde.2012.03.002.
- 520 4. Croen LA, Zerbo O, Qian Y, Massolo ML, Rich S, Sidney S, et al. The health status of adults  
521 on the autism spectrum. *Autism.* 2015;19:814–23.
- 522 5. Matson JL, Cervantes PE. Commonly studied comorbid psychopathologies among persons  
523 with autism spectrum disorder. *Research in Developmental Disabilities.* 2014;35:952–62.
- 524 6. Oliveira G, Ataíde A, Marques C, Miguel TS, Coutinho AM, Mota-Vieira L, et al.  
525 Epidemiology of autism spectrum disorder in Portugal: prevalence, clinical characterization, and  
526 medical conditions. *Dev Med Child Neurol.* 2007;49:726–33. doi:10.1111/j.1469-  
527 8749.2007.00726.x.
- 528 7. Tick B, Bolton P, Happé F, Rutter M, Rijdsdijk F. Heritability of autism spectrum disorders: A  
529 meta-analysis of twin studies. *J Child Psychol Psychiatry Allied Discip.* 2016;57:585–95.
- 530 8. Colvert E, Tick B, McEwen F, Stewart C, Curran SR, Woodhouse E, et al. Heritability of

- 531 autism spectrum disorder in a UK population-based twin sample. *JAMA Psychiatry*.  
532 2015;72:415–23.
- 533 9. Klei L, Sanders SJ, Murtha MT, Hus V, Lowe JK, Willsey AJ, et al. Common genetic  
534 variants, acting additively, are a major source of risk for autism. *Mol Autism*. 2012;3:9.  
535 doi:10.1186/2040-2392-3-9.
- 536 10. Chawarska K, Macari S, Shic F. Decreased spontaneous attention to social scenes in 6-  
537 month-old infants later diagnosed with autism spectrum disorders. *Biol Psychiatry*. 2013;74:195–  
538 203.
- 539 11. Geschwind DH, State MW. Gene hunting in autism spectrum disorder: On the path to  
540 precision medicine. *The Lancet Neurology*. 2015;14:1109–20.
- 541 12. Girirajan S, Rosenfeld JA, Coe BP, Parikh S, Friedman N, Goldstein A, et al. Phenotypic  
542 Heterogeneity of Genomic Disorders and Rare Copy-Number Variants. *N Engl J Med*.  
543 2012;367:1321–31. doi:10.1056/NEJMoa1200395.
- 544 13. Liu L, Lei J, Roeder K. Network assisted analysis to reveal the genetic basis of autism. *Ann*  
545 *Appl Stat*. 2015;9:1571–600.
- 546 14. Krishnan A, Zhang R, Yao V, Theesfeld CL, Wong AK, Tadych A, et al. Genome-wide  
547 prediction and functional characterization of the genetic basis of autism spectrum disorder. *Nat*  
548 *Neurosci*. 2016;19:1454–62. doi:10.1038/nn.4353.
- 549 15. Mahfouz A, Ziats MN, Rennert OM, Lelieveldt BPF, Reinders MJT. Shared Pathways  
550 Among Autism Candidate Genes Determined by Co-expression Network Analysis of the  
551 Developing Human Brain Transcriptome. *J Mol Neurosci*. 2015;57:580–94. doi:10.1007/s12031-



552 015-0641-3.

553 16. Noh HJ, Ponting CP, Boulding HC, Meader S, Betancur C, Buxbaum JD, et al. Network  
554 Topologies and Convergent Aetiologies Arising from Deletions and Duplications Observed in  
555 Individuals with Autism. *PLoS Genet.* 2013;9.

556 17. Correia C, Oliveira G, Vicente AM. Protein interaction networks reveal novel autism risk  
557 genes within GWAS statistical noise. *PLoS One.* 2014;9:1–11.

558 18. Pinto D, Pagnamenta AT, Klei L, Anney R, Merico D, Regan R, et al. Functional Impact of  
559 Global Rare Copy Number Variation in Autism Spectrum Disorder. *Nature.* 2010;466:368–72.  
560 doi:10.1038/nature09146.Functional.

561 19. APA. American Psychiatric Association Diagnostic and Statistical Manual of Mental  
562 Disorders (DSM-IV). SpringerReference. 2000;:Fifth Edition. Arlington, VA.  
563 doi:10.1007/SpringerReference\_179660.

564 20. Lord C, Rutter M, Le Couteur A. Autism Diagnostic Interview-Revised: A revised version of  
565 a diagnostic interview for caregivers of individuals with possible pervasive developmental  
566 disorders. *J Autism Dev Disord.* 1994;24:659–85.

567 21. Lord C, Rutter M, Goode S, Heemsbergen J, Jordan H, Mawhood L, et al. Autism  
568 diagnostic observation schedule: A standardized observation of communicative and social  
569 behavior. *J Autism Dev Disord.* 1989;19:185–212.

570 22. Sparrow S, Balla D, Cicchetti D. The Vineland Adaptive Behavior Scales: Interview edition,  
571 survey. In: *Major psychological assessment instruments.* 1984. p. 199–231.

572 23. Gotham K, Pickles A, Lord C. Standardizing ADOS scores for a measure of severity in

- 573 autism spectrum disorders. *J Autism Dev Disord*. 2009;39:693–705.
- 574 24. Stekhoven DJ, Bühlmann P. Missforest-Non-parametric missing value imputation for mixed-  
575 type data. *Bioinformatics*. 2012;28:112–8.
- 576 25. Breiman L. Random forests. *Mach Learn*. 2001;45:5–32.
- 577 26. Rokach L, Maimon O. Clustering Methods. *Data Min Knowl Discov Handb*. 2010;;321–52.  
578 doi:10.1007/0-387-25465-X\_15.
- 579 27. Gower JC. A General Coefficient of Similarity and Some of Its Properties. *Biometrics*.  
580 1971;27:857. doi:10.2307/2528823.
- 581 28. Murtagh F, Legendre P. Ward’s Hierarchical Agglomerative Clustering Method: Which  
582 Algorithms Implement Ward’s Criterion? *J Classif*. 2014;31:274–95.
- 583 29. Rousseeuw PJ. Silhouettes: A graphical aid to the interpretation and validation of cluster  
584 analysis. *J Comput Appl Math*. 1987;20 C:53–65.
- 585 30. Maechler M, Rousseeuw P, Struyf A, Hubert M, Hornik K. Cluster Analysis Basics and  
586 Extensions. R package version 2.0.1. 2015. [http://cran.r-](http://cran.r-project.org/web/packages/cluster/index.html)  
587 [project.org/web/packages/cluster/index.html](http://cran.r-project.org/web/packages/cluster/index.html).
- 588 31. Shaikh TH, Gai X, Perin JC, Glessner JT, Xie H, Murphy K, et al. High-resolution mapping  
589 and analysis of copy number variations in the human genome: A data resource for clinical and  
590 research applications. *Genome Res*. 2009;19:1682–90. doi:10.1101/gr.083501.108.
- 591 32. Cooper GM, Coe BP, Girirajan S, Rosenfeld JA, Vu TH, Baker C, et al. A copy number  
592 variation morbidity map of developmental delay. *Nat Genet*. 2011;43:838–46.

593 doi:10.1038/ng.909.

594 33. MacDonald JR, Ziman R, Yuen RKC, Feuk L, Scherer SW. The Database of Genomic  
595 Variants: A curated collection of structural variation in the human genome. *Nucleic Acids Res.*  
596 2014;42.

597 34. Parikshak NN, Luo R, Zhang A, Won H, Lowe JK, Chandran V, et al. Integrative functional  
598 genomic analyses implicate specific molecular pathways and circuits in autism. *Cell.*  
599 2013;155:1008–21. doi:10.1016/j.cell.2013.10.031.

600 35. Reimand J, Arak T, Adler P, Kolberg L, Reisberg S, Peterson H, et al. g:Profiler—a web  
601 server for functional interpretation of gene lists (2016 update). *Nucleic Acids Res.*  
602 2016;44:W83–9.

603 36. Supek F, Bošnjak M, Škunca N, Šmuc T. Revigo summarizes and visualizes long lists of  
604 gene ontology terms. *PLoS One.* 2011;6.

605 37. Schlicker A, Domingues FS, Rahnenführer J, Lengauer T. A new measure for functional  
606 similarity of gene products based on gene ontology. *BMC Bioinformatics.* 2006;7:302.  
607 doi:10.1186/1471-2105-7-302.

608 38. Liaw A, Yan J, Li W, Han L, Schroff F, Criminisi A, et al. Package “randomForest.” *R news.*  
609 2015;XXXIX:54.1-54.10.

610 39. Kuncheva LI. On the optimality of Naïve Bayes with dependent binary features. *Pattern*  
611 *Recognit Lett.* 2006;27:830–7. doi:10.1016/j.patrec.2005.12.001.

612 40. Veatch OJ, Veenstra-Vanderweele J, Potter M, Pericak-Vance MA, Haines JL. Genetically  
613 meaningful phenotypic subgroups in autism spectrum disorders. *Genes, Brain Behav.*

614 2014;13:276–85.

615 41. Rynkiewicz A, Schuller B, Marchi E, Piana S, Camurri A, Lassalle A, et al. An investigation  
616 of the “female camouflage effect” in autism using a computerized ADOS-2 and a test of  
617 sex/gender differences. *Mol Autism*. 2016;7:10. doi:10.1186/s13229-016-0073-0.

618 42. Wen Y, Alshikho MJ, Herbert MR. Pathway network analyses for autism reveal multisystem  
619 involvement, major overlaps with other diseases and convergence upon MAPK and calcium  
620 signaling. *PLoS One*. 2016;11:1–23.

621 43. O’Roak BJ, Stessman HA, Boyle EA, Witherspoon KT, Martin B, Lee C, et al. Recurrent de  
622 novo mutations implicate novel genes underlying simplex autism risk. *Nat Commun*. 2014;5.

623 44. Iossifov I, O’Roak BJ, Sanders SJ, Ronemus M, Krumm N, Levy D, et al. The contribution  
624 of de novo coding mutations to autism spectrum disorder. *Nature*. 2014;515:216–21.

625 45. Kawabe H, Brose N. The role of ubiquitylation in nerve cell development. *Nature Reviews*  
626 *Neuroscience*. 2011;12:251–68.

627 46. Nava C, Lamari F, Héron D, Mignot C, Rastetter A, Keren B, et al. Analysis of the  
628 chromosome X exome in patients with autism spectrum disorders identified novel candidate  
629 genes, including TMLHE. *Transl Psychiatry*. 2012;2:e179. doi:10.1038/tp.2012.102.

## 630 **Figure legends**

631 Figure 1: Integrative systems medicine approach to identify complex genotype-phenotype  
632 associations. Clinical and genetic data from the Autism Genome Project (AGP) was used in this  
633 study (A) Clinical data analysis processing: clinical data comprises reports of ASD diagnosis and

634 neurodevelopmental assessment instruments. Agglomerative Hierarchical Clustering (AHC) was  
635 used to identify clinically similar subgroups of individuals in stable, validated clusters, defined  
636 by multiple clinical measures. (B) CNV data processing: rare high confidence CNVs previously  
637 identified by the AGP, targeting brain-expressed genes, were retained for analysis. CNV data  
638 was merged with clinical data from clustered ASD subjects for a final list of CNVs targeting  
639 brain genes. (C) Functional annotation analysis: Biological processes defined by brain-expressed  
640 genes targeted by CNVs were obtained using g:Profiler. (D) Classifier design: A Naive Bayes  
641 machine learning classifier was trained and tested on patient's data, to predict the phenotypic  
642 clustering of patients from biological processes disrupted by rare CNVs targeting brain-  
643 expressed genes.

## A. Clinical data processing pipeline

Clinical reports:  
ADOS, ADI-R,  
IQ, and VABS

Clinical reports  
with imputed  
missing values

Agglomerative  
hierarchical  
clustering

### Clusters validation

Silhouette  
analysis

Internal and  
external clusters  
validation

Clusters stability

Stable and  
validated  
multidimensional  
clusters

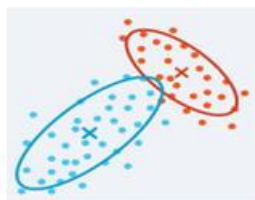

## B. CNVs data processing and functional annotation pipeline

High confidence  
and rare CNVs  
targeting brain  
genes

Merging clinical and  
CNV information

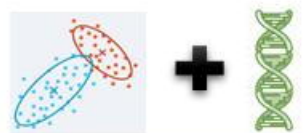

Functional  
annotation analysis

Disrupted  
biological  
processes

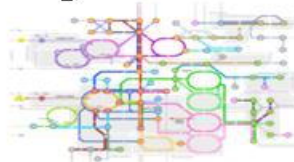

## C. Feature importance analysis

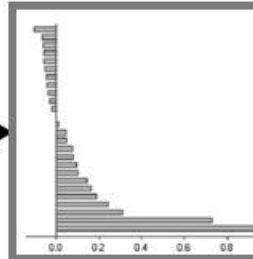

## D. Machine learning pipeline to predict clinical outcome

Classifier training  
and testing

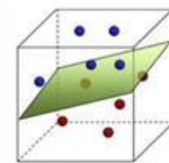

Genotype-phenotype  
associations

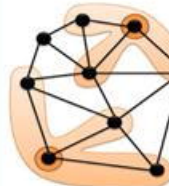

Prediction of ASD  
multidimensional  
phenotype

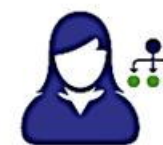

Source: https://www.biorxiv.org/content/10.1101/470757v2.full.pdf
